# Supplementary material for: An approach to identify gene-environment interactions and reveal new biological insight in complex traits
Source: PubMed Central journal article supplement (PMC11035594; doi:10.1038/s41467-024-47806-3), 2024-04-22
Supplement: 41467_2024_47806_MOESM1_ESM.pdf [file 41467_2024_47806_MOESM1_ESM.pdf]

## Supplementary Materials for

**Xiaofeng Zhu<sup>1#</sup>, Yihe Yang<sup>1</sup>, Noah Lorincz-Comi<sup>1</sup>, Gen Li<sup>1</sup>, Amy R. Bentley<sup>2</sup>, Paul S de Vries<sup>3</sup>, Michael Brown<sup>3</sup>, Alanna C. Morrison<sup>3</sup>, Charles N. Rotimi<sup>2</sup>, W. James Gauderman<sup>4</sup>, DC Rao<sup>5</sup>, Hugues Aschard<sup>6,7</sup>, the CHARGE Gene-lifestyle Interactions Working Group\***

### **Affiliations:**

<sup>1</sup>Department of Population and Quantitative Health Sciences, School of Medicine, Case Western Reserve University, Cleveland, Ohio, USA,

<sup>2</sup>Center for Research on Genomics and Global Health, National Human Genome Research Institute, National Institutes of Health, Bethesda, Maryland, USA,

<sup>3</sup>Human Genetics Center, Department of Epidemiology, School of Public Health, The University of Texas Health Science Center at Houston, Houston, Texas, USA,

<sup>4</sup>Division of Biostatistics, Department of Population and Public Health Sciences, University of Southern California, Los Angeles, CA, USA

<sup>5</sup>Center for Biostatistics and Data Science, Institute for Informatics, Data Science and Biostatistics, Washington University School of Medicine, St. Louis, MO, USA

<sup>6</sup>Institut Pasteur, Université Paris Cité, Department of Computational Biology, F-75015 Paris, France

<sup>7</sup>Program in Genetic Epidemiology and Statistical Genetics, Harvard T.H. Chan School of Public Health, Boston, MA 02115, United States

\*A list of authors and their affiliations appears at the end of the paper

# Corresponding author. Xiaofeng Zhu, Department of Population and Quantitative Health Sciences, Case Western Reserve University, Cleveland, Ohio, USA. E-mail: xxz10@case.edu

## Supplementary Note

**Statistical modeling:**  $T_{Direct}$  and  $T_{MR\ G \times E}$

### Case 1: E and G are independent.

1) When GWIS is conducted, we have the following  $G \times E$  model to a quantitative trait  $Y$ :

$$Y_i = \beta_1 G_i + \beta_2 E_i + \beta_3 (G_i E_i) + \epsilon_i, \quad (S1)$$

where  $\beta_1, \beta_2$  and  $\beta_3$  correspond to the main effect of  $G$ , the main effect of  $E$  and the interaction effect of  $G \times E$ , respectively, and  $\epsilon_i$  is a random noise. Without losing generality, we assume

$$E(G_i) = \mu_G, \quad g_i = \frac{G_i - \mu_G}{\sigma_G}, \quad E(E_i) = \mu_E, \quad e_i = \frac{E_i - \mu_E}{\sigma_E}.$$

When GWAS is conducted, we have the following model:

$$Y_i = \alpha_0 + \alpha G_i + \epsilon_i.$$

where  $\alpha$  is called the marginal effect. The relationship between marginal effect  $\alpha$ , main effect  $\beta_1$ , and interaction effect  $\beta_3$  is:

$$\alpha = \beta_1 + \mu_E \beta_3, \quad (S2)$$

indicating the marginal effect size  $\alpha$  is affected by  $G \times E$  interactions.

Similar to Aschard (1), a standardized version of (S1) is

$$Y_i = \beta'_1 g_i + \beta'_2 e_i + \beta'_3 (g_i e_i) + \epsilon'_i, \quad (S3)$$

where

$$\beta_1 = \frac{\beta'_1}{\sigma_G} - \frac{\beta'_3 \mu_E}{\sigma_E \sigma_G}, \quad \beta_2 = \frac{\beta'_2}{\sigma_E} - \frac{\beta'_3 \mu_G}{\sigma_E \sigma_G}, \quad \beta_3 = \frac{\beta'_3}{\sigma_E \sigma_G}, \quad (S4)$$

Thus

$$\alpha = \beta_1 + \mu_E \beta_3 = \frac{\beta'_1}{\sigma_G}$$

When we perform a linear regression based on standardized regression model (S1), we have

$$\boldsymbol{\beta} = (\mathbf{X}^T \mathbf{X})^{-1} \mathbf{X}^T \mathbf{Y}.$$

where  $\mathbf{X} = [\mathbf{1}, \mathbf{G}, \mathbf{E}, \mathbf{GE}]$  is the design matrix,  $\Sigma_{\boldsymbol{\beta}} = (\mathbf{X}^T \mathbf{X})^{-1} \sigma^2$ , and  $\sigma^2$  is the variance of  $\epsilon$ .

$$\Sigma_{\boldsymbol{\beta}} = \frac{\sigma^2}{n} \begin{bmatrix} E[1] & E[G] & E[E] & E[GE] \\ E[G] & E[G^2] & E[GE] & E[G^2 E] \\ E[E] & E[GE] & E[G^2] & E[GE^2] \\ E[GE] & E[G^2 E] & E[GE^2] & E[G^2 E^2] \end{bmatrix}^{-1}, \quad (S5)$$

where  $n$  is the sample size in performing GWIS analysis.

When working on  $g_i$  and  $e_i$ , the standardized of  $G_i$  and  $E_i$ , it leads

$$\Sigma_{\beta'} = \frac{\sigma^2}{n} \begin{bmatrix} E[1] & 0 & 0 & 0 \\ 0 & E[g^2] & 0 & 0 \\ 0 & 0 & E[e^2] & 0 \\ 0 & 0 & 0 & E[g^2 e^2] \end{bmatrix}^{-1} = \frac{1}{n} I_{4 \times 4} \sigma^2, \quad (\text{S6})$$

where  $I_{4 \times 4}$  is a  $4 \times 4$  identity matrix. Since we are not interested in the intercept, we will ignore the intercept and let  $\boldsymbol{\beta} = [\beta_1, \beta_2, \beta_3]^T$ . We can calculate the covariance  $\Sigma_{\boldsymbol{\beta}}$  through equations (S4), which leads to

$$\Sigma_{\boldsymbol{\beta}} = \frac{\sigma^2}{n\sigma_G^2\sigma_E^2} \begin{bmatrix} \mu_E^2 + \sigma_E^2 & \mu_E\mu_G & -\mu_E \\ \mu_E\mu_G & \mu_G^2 + \sigma_G^2 & -\mu_G \\ -\mu_E & -\mu_G & 1 \end{bmatrix}.$$

Thus, we have

$$\begin{aligned} \text{var}(\alpha) &= \text{var}(\beta_1 + \mu_E\beta_3) = \frac{\sigma^2}{n\sigma_G^2}, & \text{var}(\beta_1) &= \frac{\sigma^2(\mu_E^2 + \sigma_E^2)}{n\sigma_G^2\sigma_E^2}, \\ \text{var}(\beta_2) &= \frac{\sigma^2(\mu_G^2 + \sigma_G^2)}{n\sigma_G^2\sigma_E^2}, & \text{var}(\beta_3) &= \frac{\sigma^2}{n\sigma_G^2\sigma_E^2}, & \text{var}(\alpha - \beta_1) &= \frac{\mu_E^2\sigma^2}{n\sigma_G^2\sigma_E^2}, \\ \text{cov}(\alpha, \beta_1) &= \text{cov}(\beta_1 + \mu_E\beta_3, \beta_1) = \frac{\sigma^2}{n\sigma_G^2}, & \text{cov}(\alpha, \beta_2) &= \text{cov}(\beta_1 + \mu_E\beta_3, \beta_2) = 0, \\ \text{cov}(\alpha, \beta_3) &= \text{cov}(\beta_1 + \mu_E\beta_3, \beta_3) = 0, & \text{cov}(\alpha - \beta_1, \beta_3) &= \text{cov}(\mu_E\beta_3, \beta_3) = \frac{\mu_E^2\sigma^2}{n\sigma_G^2\sigma_E^2}, \\ & & \text{corr}(\alpha - \beta_1, \beta_3) &= 1. \end{aligned}$$

To test interaction  $\beta_3 = 0$ , we apply the direct test  $T_{\text{Direct}} = \frac{\beta_3^2}{\text{var}(\beta_3)}$ . Alternatively, we can test  $\alpha - \beta_1 = 0$  by  $T_{\text{diff}} = \frac{(\alpha - \beta_1)^2}{\text{var}(\alpha - \beta_1)}$ . Clearly,  $T_{\text{Direct}}$  and  $T_{\text{diff}}$  are the same when G and E are independent and GWAS and GWIS are performed in the same data.  $T_{\text{Direct}}$  and  $T_{\text{diff}}$  have the same non-centrality parameter:

$$NCT_{\text{diff}} = NCT_{\text{Direct}} = \frac{n\sigma_G^2\sigma_E^2\beta_3^2}{\sigma^2}.$$

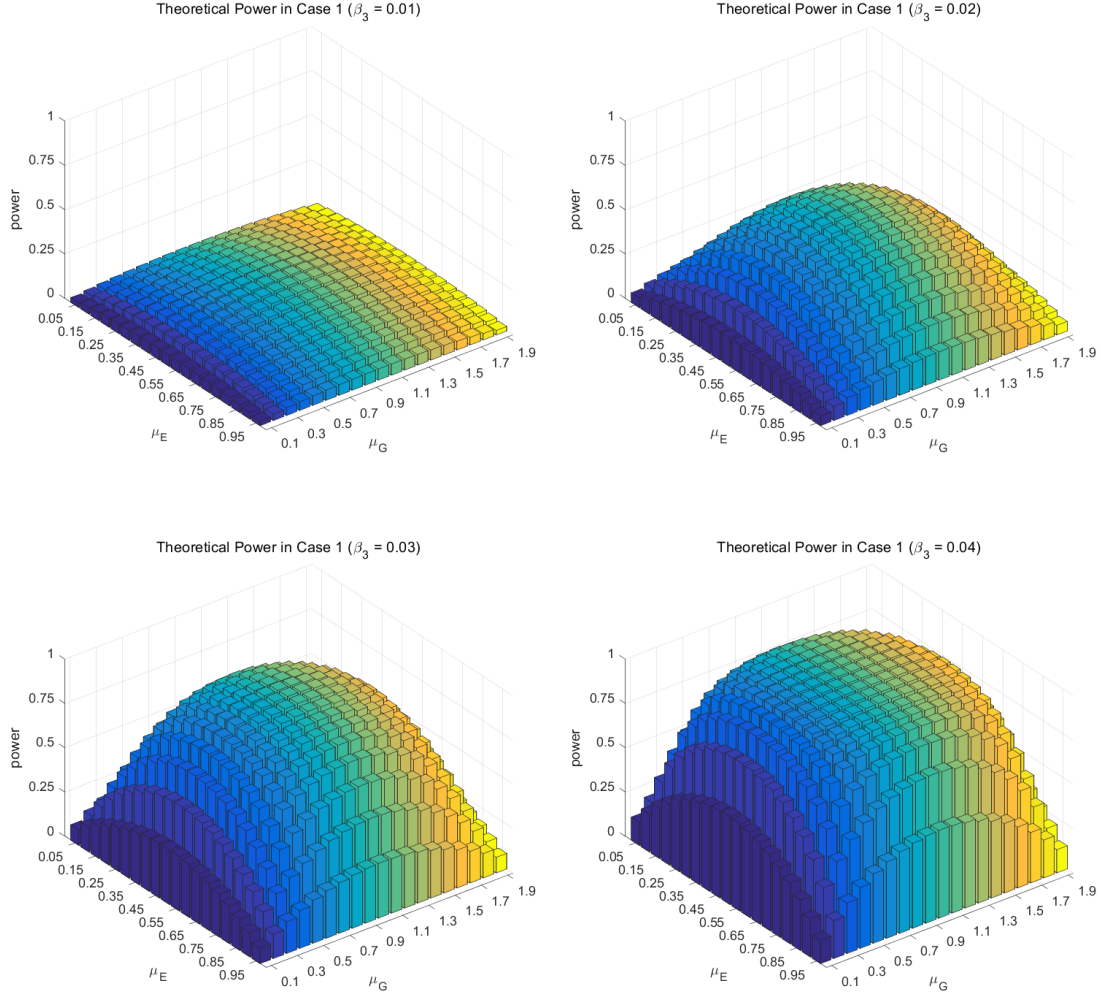

**Supplementary Figure 1.** The theoretical power of  $T_{Direct}$  and  $T_{diff}$  under the scenario of Case 1, which is identical. The four subplots correspond to  $\beta_3$  ranging from 0.01 to 0.04. For each subplot, the x-axis represents the mean  $\mu_G$  of the variant, the y-axis represents the mean  $\mu_E$  of the environmental factor, and the z-axis represents the theoretical power. Additionally, the sample size  $n = 100K$ , and  $\sigma$  was set to be 1.

### Case 2: E and G are dependent.

When  $E$  and  $G$  are correlated, equation (S4) still holds. However, the covariance matrix  $\Sigma_{\beta'}$  is

$$\Sigma_{\beta'} = \frac{\sigma^2}{n} \begin{bmatrix} 1 & 0 & 0 & \rho \\ 0 & 1 & \rho & E[g^2e] \\ 0 & \rho & 1 & E[ge^2] \\ \rho & E[g^2e] & E[ge^2] & E[g^2e^2] \end{bmatrix}^{-1}, \quad (S7)$$

where  $\rho$  is the correlation between  $e_i$  and  $g_i$ . To simplify our discussion, we further assume that the environmental factor is mediated by  $g$ , which is

$$e_i = \rho g_i + \epsilon_i, \quad \text{var}(\epsilon) = 1 - \rho^2. \quad (\text{S8})$$

Thus,

$$E[g^2 e] = \rho E[g^3] = \rho \frac{1 - \mu_G}{\sigma_G}, \quad (\text{S9})$$

$$E[ge^2] = \rho^2 E[g^3] = \rho^2 \frac{1 - \mu_G}{\sigma_G}, \quad (\text{S10})$$

$$E[g^2 e^2] = \rho^2 E[g^4] + 1 - \rho^2 = \frac{\rho^2}{\sigma_G^2} + 1 - \rho^2, \quad (\text{S11})$$

and

$$\Sigma_{\beta'} = \frac{\sigma^2}{n} \begin{bmatrix} 1 + \rho^2 & \frac{\rho^2(1 - \mu_G)}{\sigma_G} & 0 & -\rho \\ \frac{\rho^2(1 - \mu_G)}{\sigma_G} & 1 + \frac{\rho^2}{1 - \rho^2} + \frac{\rho^2(1 - \mu_G)^2}{\sigma_G^2} & \frac{-\rho}{1 - \rho^2} & \frac{-\rho(1 - \mu_G)}{\sigma_G} \\ 0 & \frac{-\rho}{1 - \rho^2} & \frac{1}{1 - \rho^2} & 0 \\ -\rho & \frac{-\rho(1 - \mu_G)}{\sigma_G} & 0 & 1 \end{bmatrix}. \quad (\text{S12})$$

By using the equations in (S4) and ignoring the intercept, and let  $\beta = [\beta_1, \beta_2, \beta_3]^T$ , we have:

$$\Sigma_{\beta} = \frac{\sigma^2}{n} \begin{bmatrix} \frac{1}{\sigma_G^2} \left[ \frac{1}{1 - \rho^2} + \left( \frac{\rho(1 - \mu_G)}{\sigma_G} + \frac{\mu_E}{\sigma_E} \right)^2 \right] & \frac{\rho}{\sigma_G \sigma_E} \left[ \frac{-1}{1 - \rho^2} + \frac{\mu_G(1 - \mu_G)}{\sigma_G^2} \right] + \frac{\mu_G \mu_E}{\sigma_G^2 \sigma_E^2} & \frac{-1}{\sigma_G^2 \sigma_E} \left[ \frac{\rho(1 - \mu_G)}{\sigma_G} + \frac{\mu_E}{\sigma_E} \right] \\ \frac{\rho}{\sigma_G \sigma_E} \left[ \frac{-1}{1 - \rho^2} + \frac{\mu_G(1 - \mu_G)}{\sigma_G^2} \right] + \frac{\mu_G \mu_E}{\sigma_G^2 \sigma_E^2} & \frac{1}{\sigma_E^2} \left[ \frac{1}{1 - \rho^2} + \frac{\mu_G^2}{\sigma_G^2} \right] & \frac{-\mu_G}{\sigma_G^2 \sigma_E^2} \\ \frac{-1}{\sigma_G^2 \sigma_E} \left[ \frac{\rho(1 - \mu_G)}{\sigma_G} + \frac{\mu_E}{\sigma_E} \right] & \frac{-\mu_G}{\sigma_G^2 \sigma_E^2} & \frac{1}{\sigma_G^2 \sigma_E^2} \end{bmatrix}, \quad (\text{S13})$$

When  $G$  and  $E$  are dependent, we have:

$$\begin{aligned} \alpha &= \frac{\text{cov}(Y, G)}{\sigma_G^2} = \frac{\text{cov}(\beta_1 G + \beta_2 E + \beta_3(GE), G)}{\sigma_G^2} \\ &= \beta_1 + \frac{\rho \sigma_E}{\sigma_G} \beta_2 + \left( \mu_E + \frac{\rho \sigma_E}{\sigma_G} \right) \beta_3, \end{aligned} \quad (\text{S14})$$

which further indicates the marginal effect size  $\alpha$  is affected by  $G \times E$  interactions and the mediation through  $E$ .

By using (S13), we have

$$\text{var}(\alpha) = \frac{\sigma^2}{n \sigma_G^2}, \quad (\text{S15})$$

$$\text{cov}(\alpha, \beta_3) = \text{cov}\left(\beta_1 + \frac{\rho\sigma_E}{\sigma_G}\beta_2 + \left(\mu_E + \frac{\rho\sigma_E}{\sigma_G}\right)\beta_3, \beta_3\right) = 0, \quad (\text{S16})$$

$$\text{cov}(\alpha, \beta_1) = \frac{\sigma^2}{n\sigma_G^2}, \quad (\text{S17})$$

$$\text{corr}(\alpha, \beta_1) = \frac{1}{\sqrt{\frac{1}{1-\rho^2} + \left(\frac{\rho(1-\mu_G)}{\sigma_G} + \frac{\mu_E}{\sigma_E}\right)^2}}, \quad (\text{S18})$$

$$\text{var}(\alpha - \beta_1) = \frac{\sigma^2}{n\sigma_G^2} \left[ \frac{\rho^2}{1-\rho^2} + \left(\frac{\rho(1-\mu_G)}{\sigma_G} + \frac{\mu_E}{\sigma_E}\right)^2 \right], \quad (\text{S19})$$

$$\text{cov}(\alpha - \beta_1, \beta_3) = \frac{\sigma^2}{n\sigma_G^2\sigma_E} \left[ \frac{\rho(1-\mu_G)}{\sigma_G} + \frac{\mu_E}{\sigma_E} \right], \quad (\text{S20})$$

$$\text{corr}(\alpha - \beta_1, \beta_3) = \frac{\frac{\rho(1-\mu_G)}{\sigma_G} + \frac{\mu_E}{\sigma_E}}{\sqrt{\frac{\rho^2}{1-\rho^2} + \left(\frac{\rho(1-\mu_G)}{\sigma_G} + \frac{\mu_E}{\sigma_E}\right)^2}}, \quad (\text{S21})$$

When  $\rho=0$ , equation (S21) reduces to  $\text{corr}(\alpha - \beta_1, \beta_3) = 1$ . The direct test  $T_{\text{Direct}} = \frac{\beta_3^2}{\text{var}(\beta_3)}$  still tests the  $G \times E$  interaction, but testing  $\alpha - \beta_1 = 0$  by  $T_{\text{diff}} = \frac{(\alpha - \beta_1)^2}{\text{var}(\alpha - \beta_1)}$  tests for  $\frac{\rho\sigma_E}{\sigma_G}\beta_2 + \left(\mu_E + \frac{\rho\sigma_E}{\sigma_G}\right)\beta_3 = 0$ , which is testing for the combination of mediation ( $\rho$ ) and interaction ( $\beta_3$ ).

Above discussion suggests that when mediation is present,  $T_{\text{diff}}$  will also detect mediation even there is no  $G \times E$  interaction. However, we can test the  $G \times E$  interaction through two step procedure: 1) We apply  $T_{\text{diff}}$  to search for variants with joint effect of mediation and interaction effect; 2) we apply  $T_{\text{Direct}}$  for the variants detected by  $T_{\text{diff}}$ . Although  $T_{\text{diff}}$  and  $T_{\text{Direct}}$  are correlated, this procedure seems to have a good control of the type I error rate in the simulations which mimic the real data. The reason is that we can exclude the genetic variants strongly associated with the environment factor from the GWAS of E. Therefore, the contribution of mediation has little effect (see the simulation results Fig 3 and Fig S6). It also improves the power because of the mediation and the reduction of multiple test burden.

When mediation effect presents,  $T_{\text{diff}}$  has a non-centrality parameter:

$$NCT_{\text{diff}} = \frac{n\sigma_G^2 \left[ \frac{\rho\sigma_E}{\sigma_G}(\beta_2 + \beta_3) + \mu_E\beta_3 \right]^2}{\sigma^2 \left[ \frac{\rho^2}{1-\rho^2} + \left(\frac{\rho(1-\mu_G)}{\sigma_G} + \frac{\mu_E}{\sigma_E}\right)^2 \right]}, \quad NCT_{\text{Direct}} = \frac{n\sigma_G^2\sigma_E^2\beta_3^2}{\sigma^2}$$

when  $\rho \neq 0$ ,  $T_{\text{diff}}$  can be more powerful than  $T_{\text{Direct}}$ .

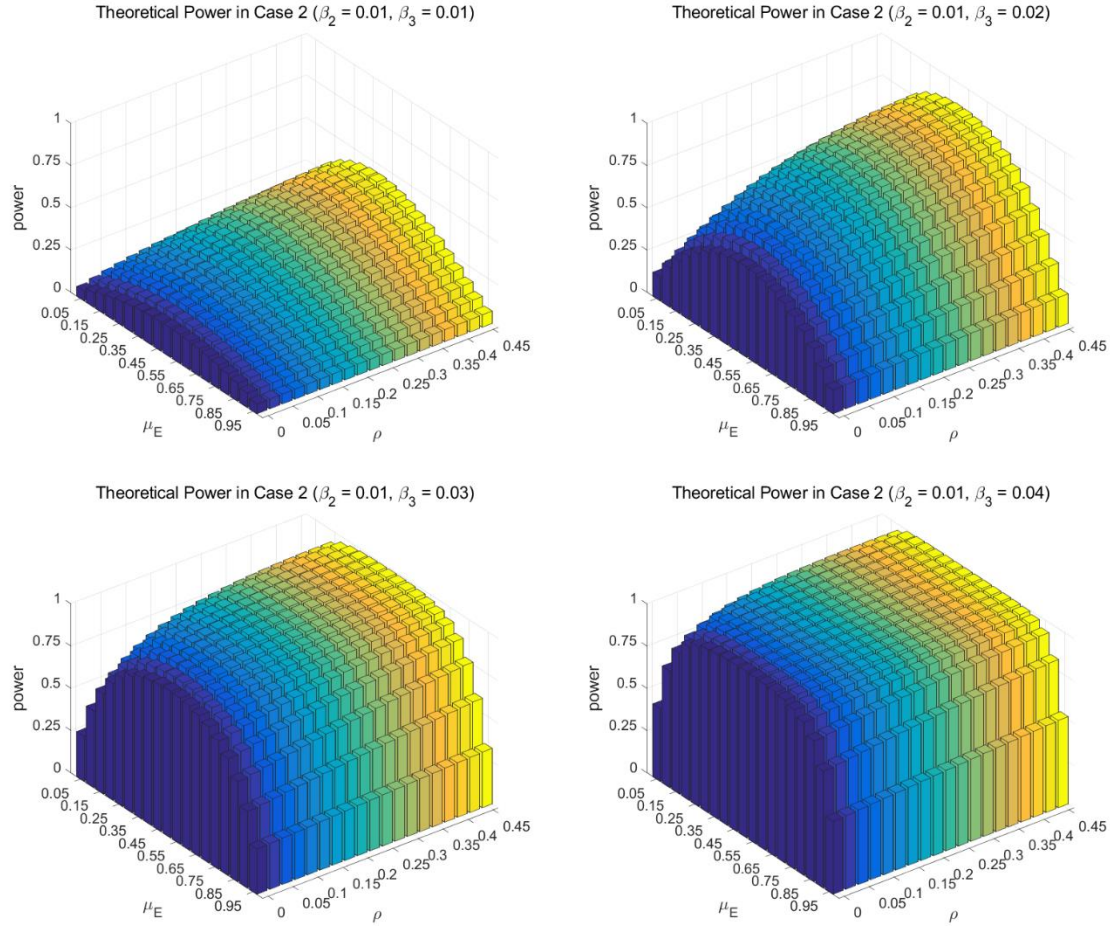

**Supplementary Figure 2.** The theoretical power of  $T_{diff}$  under the scenario of Case 2. For each subplot, the x-axis represents the correlation coefficient  $\rho$  of mediation, the y-axis represents the mean  $\mu_E$  of the environmental factor, and the z-axis represents the theoretical power. Additionally, the sample size is  $n = 100K$ , the genotype has allele frequency or mean  $\mu_G=0.6$ .  $\sigma$  was set to 1. As the correlation coefficient  $\rho$  of mediation increases, the power of  $T_{diff}$  significantly rises. Furthermore, due to the variance changes in  $NCT_{diff}$ , the power does not symmetrically decrease as  $\mu_E$  increases or decreases from 0.5. In fact, the decline in power with an increase in  $\mu_E$  is slightly faster than the decrease in power with a reduction in  $\mu_E$  from 0.1.

**Case 3. GWAS and GWIS are performed in different samples with overlapping.**

We are now working on the case when GWAS and GWIS are performed in different sample sizes. Let  $n_1, n_2$  and  $n_0$  represent the sample sizes of GWAS, GWIS and overlapping sample between GWAS and GWIS. In this case, the marginal effect  $\alpha$  is estimated from GWAS and  $\beta_1, \beta_2, \beta_3$  are estimated from GWIS, respectively. We can deduce the covariance between  $\alpha$  and  $\beta_1, \beta_2, \beta_3$  using the work in Case 1 and 2.

Let a random variable  $I$  takes 1 when samples are overlapped and 0 when samples are not overlapped. The estimates of  $\alpha$  and  $\beta$  are the weighted estimates of them in overlapped sample and non-overlapped samples. That is,

$$\alpha = \alpha^{(O)}P(I = 1) + \alpha^{(n_1 \setminus O)}P(I = 0),$$

$$\beta = \beta^{(O)}P(I = 1) + \beta^{(n_2 \setminus O)}P(I = 0),$$

where index  $(O)$ ,  $(n_1 \setminus O)$  and  $(n_2 \setminus O)$  represent overlapped, GWAS samples after excluding the overlapped, and GWIS samples after excluding the overlapped samples, which lead to the following:

$$\alpha = \frac{n_o}{n_1} \alpha^{(O)} + \frac{n_1 - n_o}{n_1} \alpha^{(n_1 \setminus O)},$$

$$\beta = \frac{n_o}{n_2} \beta^{(O)} + \frac{n_2 - n_o}{n_2} \beta^{(n_2 \setminus O)},$$

$$\begin{aligned} \text{cov}(\alpha - \beta_1, \beta_3) &= \text{cov}\left(\frac{n_o}{n_1} \alpha^{(O)} + \frac{n_1 - n_o}{n_1} \alpha^{(n_1 \setminus O)}, \frac{n_o}{n_2} \beta_3^{(O)} + \frac{n_2 - n_o}{n_2} \beta_3^{(n_1 \setminus O)}\right) - \text{cov}(\beta_1, \beta_3) \\ &= \text{cov}\left(\frac{n_o}{n_1} \alpha^{(O)}, \frac{n_o}{n_2} \beta_3^{(O)}\right) - \text{cov}(\beta_1, \beta_3) = -\text{cov}(\beta_1, \beta_3) \\ &= \frac{\sigma^2}{n_2 \sigma_{G_2}^2 \sigma_{E_2}} \left[ \frac{\rho(1 - \mu_{G_2})}{\sigma_{G_2}} + \frac{\mu_{E_2}}{\sigma_{E_2}} \right], \end{aligned} \quad (\text{S22})$$

Thus,  $\text{cov}(\alpha, \beta_3) = \text{cov}(\alpha - \beta_1, \beta_3) + \text{cov}(\beta_1, \beta_3) = 0$

$$\begin{aligned} \text{cov}(\alpha, \beta_1) &= \text{cov}\left(\frac{n_o}{n_1} \alpha^{(O)} + \frac{n_1 - n_o}{n_1} \alpha^{(n_1 \setminus O)}, \frac{n_o}{n_2} \beta_1^{(O)} + \frac{n_2 - n_o}{n_2} \beta_1^{(n_1 \setminus O)}\right) \\ &= \frac{n_o \sigma^2}{n_1 n_2 \sigma_{G_0}^2}, \end{aligned} \quad (\text{S23})$$

$$\text{corr}(\alpha, \beta_1) = \frac{n_o \sigma_{G_1} \sigma_{G_2}}{\sigma_{G_0}^2 \sqrt{n_1 n_2 \left[ \frac{1}{1 - \rho^2} + \left( \frac{\rho(1 - \mu_{G_2})}{\sigma_{G_2}} + \frac{\mu_{E_2}}{\sigma_{E_2}} \right)^2 \right]}}, \quad (\text{S24})$$

where  $\mu_{G_2}$ ,  $\sigma_{G_2}$ ,  $\mu_{E_2}$ , and  $\sigma_{E_2}$  refer to the mean and standard deviation of  $G$  and  $E$  in GWIS samples,  $\mu_{G_1}$ ,  $\sigma_{G_1}$ ,  $\mu_{E_1}$ , and  $\sigma_{E_1}$  refer to the mean and standard deviation of  $G$  and  $E$  in GWAS samples, and  $\mu_{G_0}$ ,  $\sigma_{G_0}$ ,  $\mu_{E_0}$ , and  $\sigma_{E_0}$  refer to the mean and standard deviation of  $G$  and  $E$  in the overlapped samples by GWAS and GWIS, respectively. Then we have the following:

$$\alpha - \beta_1 = \frac{\rho \sigma_{E_1}}{\sigma_{G_1}} \beta_2 + \left( \mu_{E_1} + \frac{\rho \sigma_{E_1}}{\sigma_{G_1}} \right) \beta_3$$

and

$$\text{var}(\alpha - \beta_1) = \sigma^2 \left[ \frac{1}{n_1 \sigma_{G_1}^2} - \frac{2n_o}{n_1 n_2 \sigma_{G_0}^2} + \frac{1}{n_2 \sigma_{G_2}^2} \left( \frac{1}{1 - \rho^2} + \left( \frac{\rho(1 - \mu_{G_2})}{\sigma_{G_2}} + \frac{\mu_{E_2}}{\sigma_{E_2}} \right)^2 \right) \right]. \quad (\text{S25})$$



$T_{diff}$  has a non-centrality parameter:

$$NCT_{diff} = \frac{(\frac{\rho\sigma_{E1}}{\sigma_{G1}}\beta_2 + (\mu_{E1} + \frac{\rho\sigma_{E1}}{\sigma_{G1}})\beta_3)^2}{\sigma^2[\frac{1}{n_1\sigma_{G1}^2} - \frac{2n_0}{n_1n_2\sigma_{G0}^2} + \frac{1}{n_2\sigma_{G2}^2}(\frac{1}{1-\rho^2} + (\frac{\rho(1-\mu_{G2})}{\sigma_{G2}} + \frac{\mu_{E2}}{\sigma_{E2}})^2)]}$$

and  $T_{Direct}$  has a non-centrality parameter:

$$NCT_{Direct} = \frac{n_2\sigma_{G2}^2\sigma_{E2}^2\beta_3^2}{\sigma^2}.$$

*Noted that  $cov(\alpha, \beta_3) = 0$  is also hold when  $\beta_3$  is estimated from the GWAS sample excluding GWIS sample. As a result,  $T_{diff}$  is independent of  $\beta_3$  when the  $\beta_3$  is estimated from the GWAS sample excluding GWIS sample. Therefore, the direct test  $T_{Direct}$  using the GWAS sample after excluding GWIS sample is an independent replication for either  $T_{diff}$  or GWIS  $T_{Direct}$  test.*

$T_{diff}$  is still testing for the combined effect of mediation and interaction and its power depends on the environmental mean and variance in the GWAS data. Again, we can test the  $G \times E$  interaction through the two-step procedure: 1) We apply  $T_{diff}$  to search variants with joint effect of mediation and interaction effect; 2) we apply  $T_{Direct}$  for the variants detected by  $T_{diff}$ . Since GWAS is often conducted in much larger sample size than GWIS, the power of  $T_{diff}$  is increased, therefore, the two-step procedure for testing interactions is also increased.

In practice, the GWIS sample is often a subset of GWAS. In this case,  $n_0 = n_2$ , which leads to

$$NCT_{diff} = \frac{(\frac{\rho\sigma_{E1}}{\sigma_{G1}}\beta_2 + (\mu_{E1} + \frac{\rho\sigma_{E1}}{\sigma_{G1}})\beta_3)^2}{\sigma^2[\frac{1}{n_1\sigma_{G1}^2} - \frac{2}{n_1\sigma_{G2}^2} + \frac{1}{n_2\sigma_{G2}^2}(\frac{1}{1-\rho^2} + (\frac{\rho(1-\mu_{G2})}{\sigma_{G2}} + \frac{\mu_{E2}}{\sigma_{E2}})^2)]}.$$

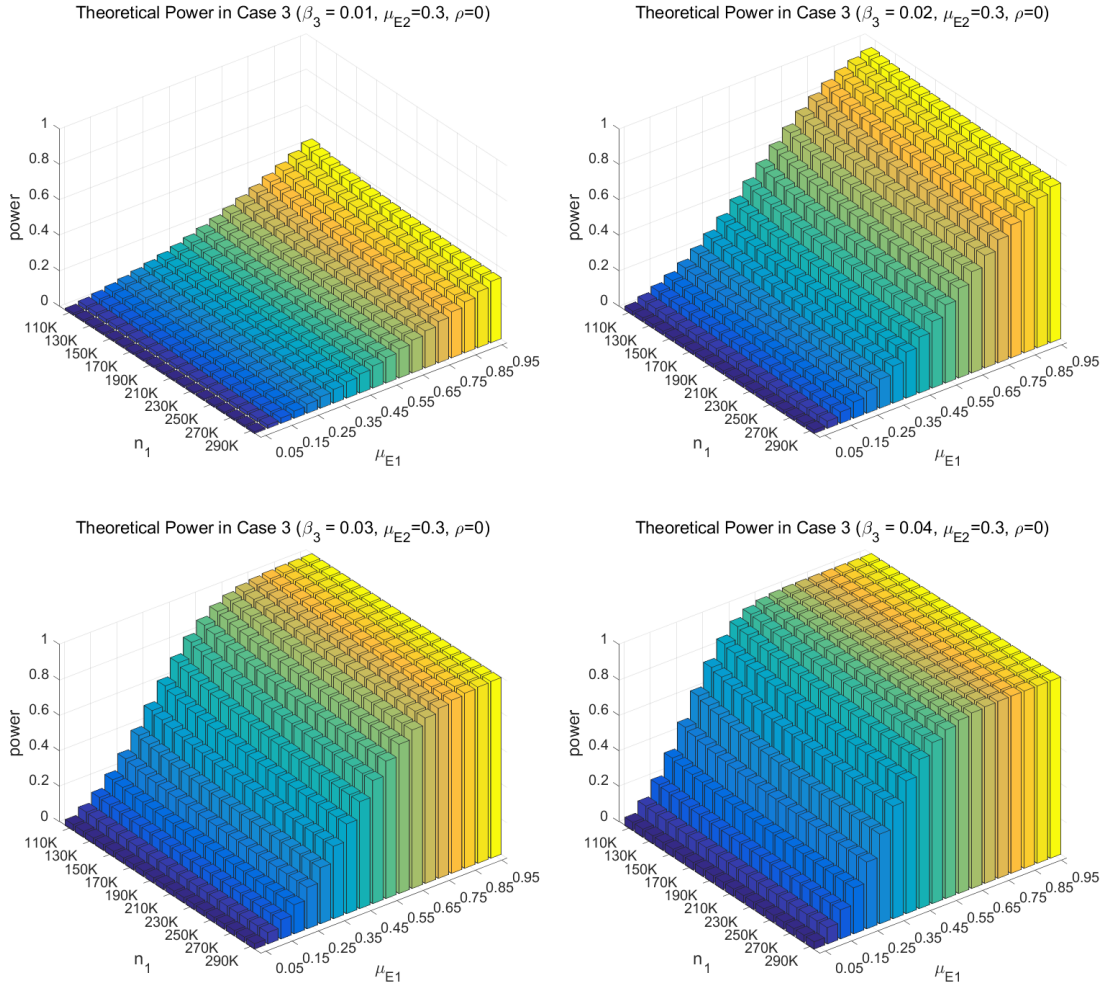

**Supplementary Figure 3.** The theoretical power of  $T_{diff}$  under the scenario of Case 3. For each subplot, the x-axis represents the mean  $\mu_{E1}$  of the environmental factor, the y-axis represents the sample size  $n_1$  in the GWAS data, and the z-axis represents the theoretical power. Additionally, the sample size in the GWIS data is  $n_2 = 100K$ , the mean  $\mu_{E2}$  of the environmental factor in the GWIS data is 0.3, the mean  $\mu_G$  of the variant is 0.6, the correlation coefficient of mediation  $\rho = 0$ , and the variance of the random error  $\sigma = 1$ . It can be observed that as  $\mu_{E1}$  increases relative to the data in the GWIS, the power substantially rises and is insensitive to the increase in  $n_1$ .

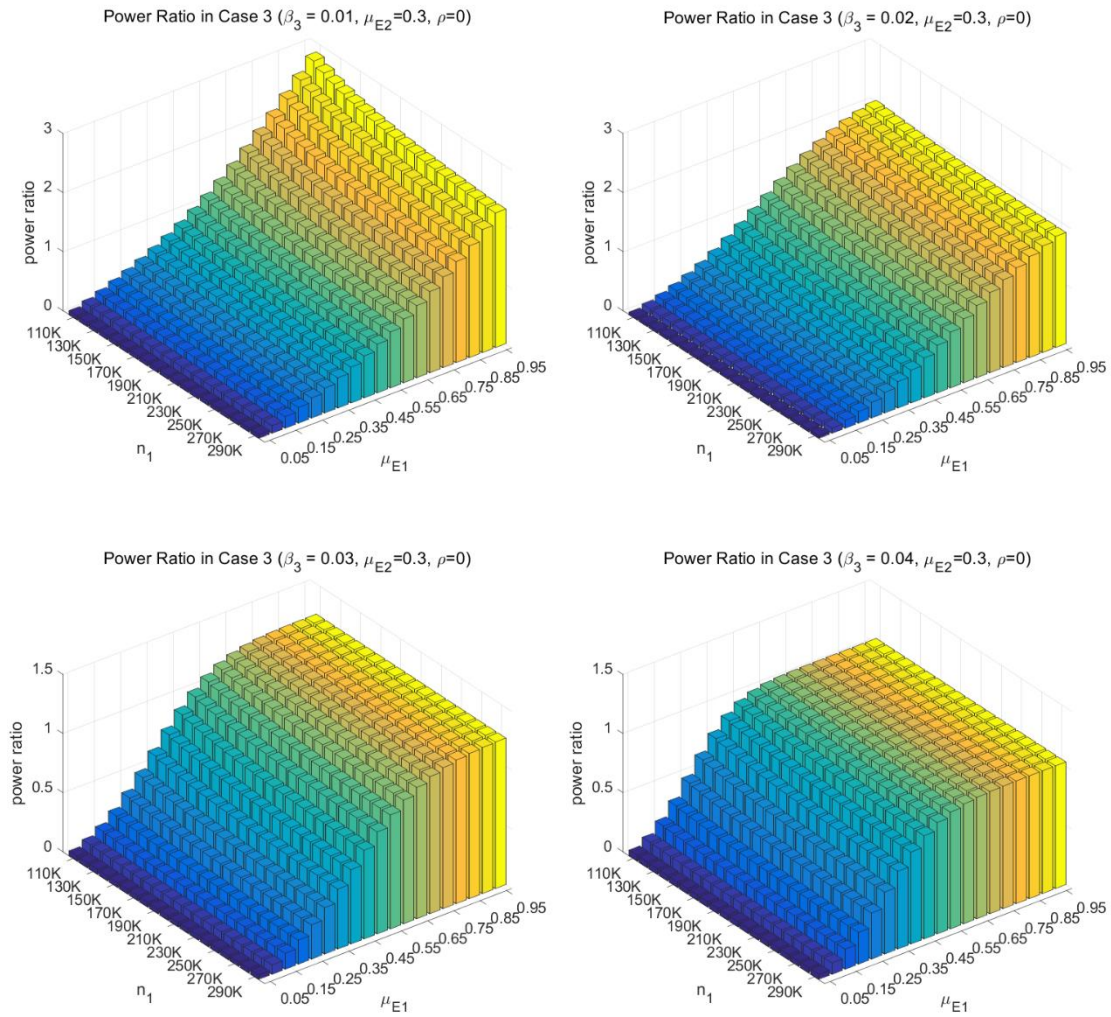

**Supplementary Figure 4.** The comparison between  $T_{diff}$  and  $T_{direct}$  under the scenario of Case 3 but no mediation. The z-axis represents the ratio of the power of  $T_{diff}$  over the power of  $T_{direct}$ . If this ratio is larger than 1, then  $T_{diff}$  is more powerful than  $T_{direct}$ . Generally,  $T_{diff}$  is more powerful than  $T_{direct}$  if  $\mu_{E2} > 0.5$  and  $\mu_{E1} = 0.3$ .

**Supplementary Figure 5.** The scatterplots between z-scores of  $T_{MR_{GxE}}$  test based on  $(\hat{\alpha} - \hat{\theta}\beta_1)$  and direct test ( $T_{Direct}$ ) based on effect sizes  $\hat{\beta}_3$  obtained in GLI data. Because the GWAS was performed with smoking status as a covariate, the z-scores of  $T_{MR_{GxE}}$  and  $T_{Direct}$  should be similar. The Pearson correlation coefficient between z-scores of  $T_{MR_{GxE}}$  test and  $T_{Direct}$  is 0.977, which is consistent. The red straight line represents the regression line.

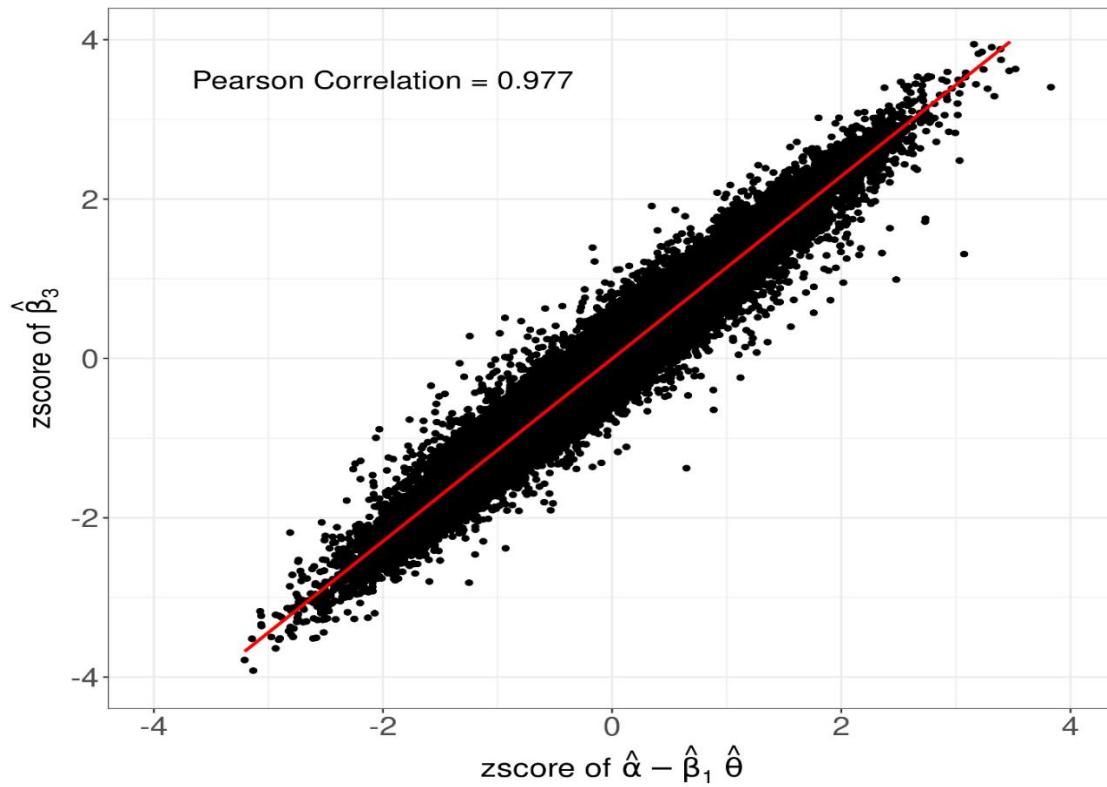

**Supplementary Figure 6.** The estimations of  $\theta$ , interaction effect  $\beta_3$ , and the comparison of type I error and power for  $T_{MR_{GxE}}$  and the direct test for the  $G \times E$  interaction when there is no mediation. The GWAS sample size is two times of GWIS sample size and GWIS sample is the subset of GWAS sample:  $n_1 = 2n_2 = 2n_0$ . The sample size  $n_2$  increases from 60k to 150k. We set  $\mu_E^{mar} = 1$  and  $\mu_E^{int} = 0.5$ . (a). Box plots of  $\hat{\theta}$  in simulations under different GWIS sample sizes. The top and bottom edges of the box plots represent the 25<sup>th</sup> and 75<sup>th</sup> percentiles of  $\hat{\theta}$ , and the horizontal middle line represents the 50<sup>th</sup> percentile. The vertical bars extend from the 25<sup>th</sup> (or 75<sup>th</sup>) percentile of  $\hat{\theta}$  to the minimum (or maximum) value of simulated data.  $E(\hat{\theta})$  converges to 1 as sample size increases. (b). Box plots of the direct estimate of  $\beta_3$  in GWIS (top panel) and by  $(\hat{\alpha} - \hat{\beta}_1\hat{\theta})/\mu_e$  through MR-  $G \times E$  analysis (bottom panel). The box plots are interpreted the same as in **A** accordingly. The direct estimate of  $\beta_3$  in GWIS or by  $(\hat{\alpha} - \hat{\beta}_1\hat{\theta})/\mu_e$  through MR-GxE analysis are both unbiased. Here  $s=-1$  refers to the main effect and interaction effect have opposite effect directions;  $s=0$  refers no main effect; and  $s=1$  refers that the main effect and interaction effect have the same effect direction. (c). Type I error rate comparison between  $T_{MR_{GxE}}$  and the direct test for different main and interaction effect directions. Both  $T_{MR_{GxE}}$  and the direct test maintain the type I error well. (d) Power comparison between  $T_{MR_{GxE}}$  and the direct test for different main and interaction effect directions.

(a). Estimation of  $\theta$

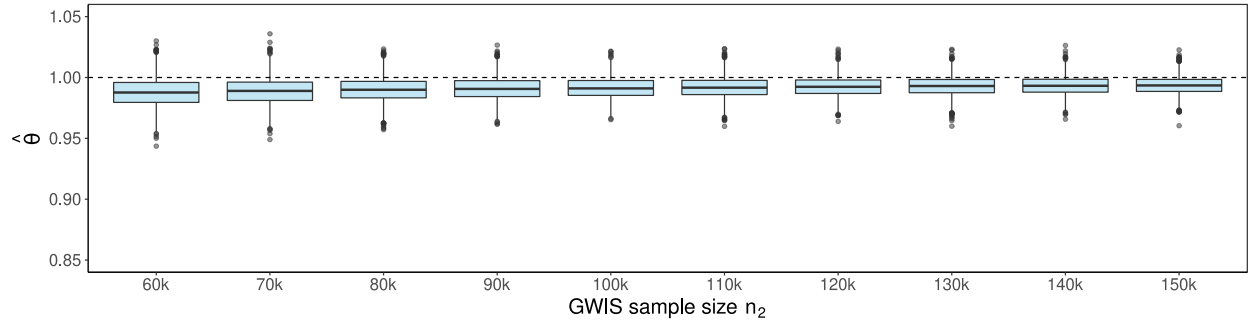

(b). Estimation of Interaction Effect  $\beta_3$

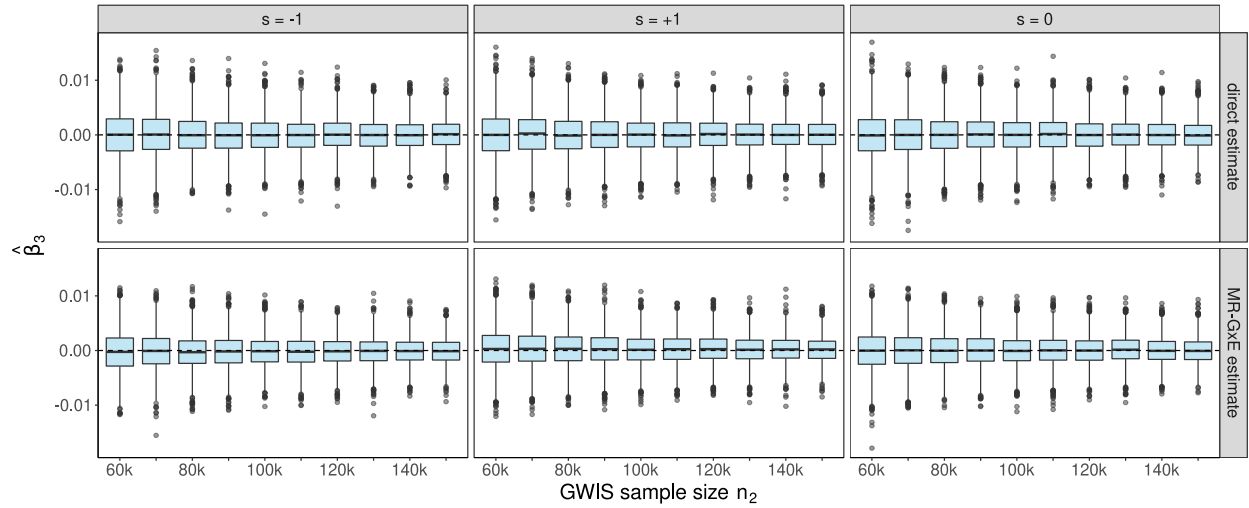

(c). Type-I error of Interaction Test

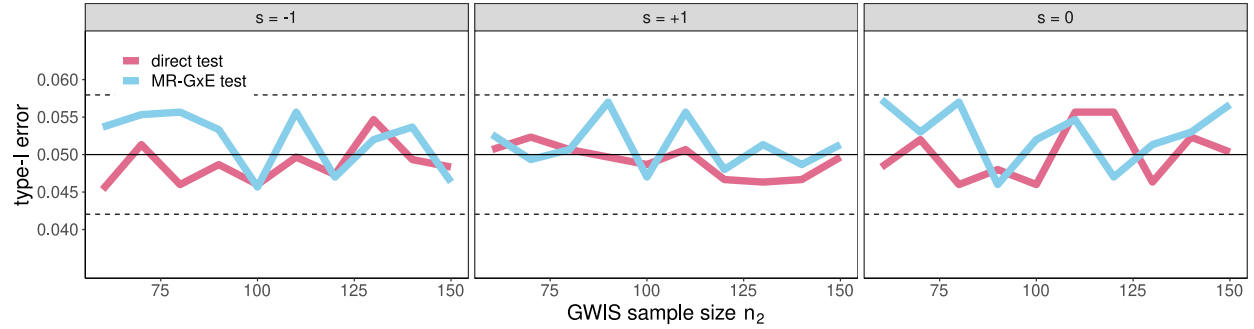

(d). Power of Interaction Test

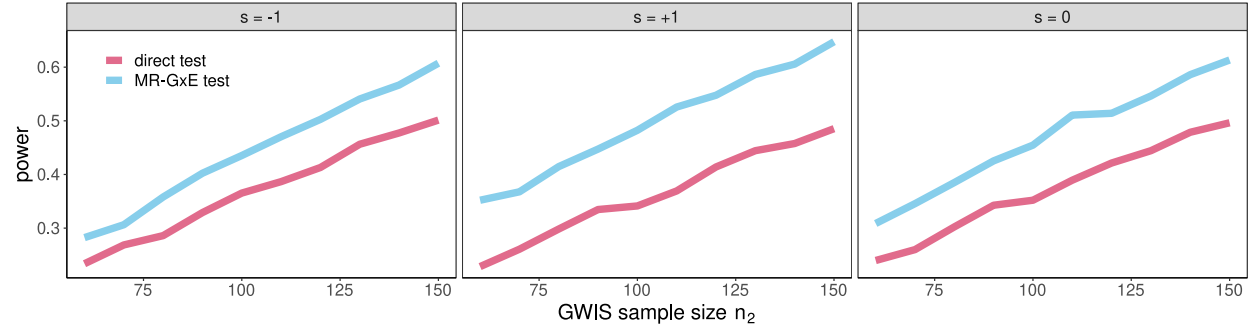

**Supplementary Figure 7.** (a) and (c): direct estimate  $\hat{\beta}_3$  and MR-GxE estimate  $(\hat{\alpha} - \hat{\beta}_1 \hat{\theta}) / \mu_E^{mar}$  of interaction effect when true  $\beta_3 = 0$ . (b) and (d): direct estimate  $\hat{\beta}_3$  and MR-GxE estimate  $(\hat{\alpha} - \hat{\beta}_1 \hat{\theta}) / \mu_E^{mar}$  of interaction effect when true  $\beta_3 = 0.005$ . Settings of (a) and (b):  $\mu_E^{mar} = 1$ ,  $\mu_E^{int} = 0.5$ ,  $n_1 = 2n_2 = 2n_0$  where  $n_2$  increases from 60k to 150k. Settings of (c) and (d):  $n_1 = 160k$ ,  $n_2 = 80k$ ,  $n_0 = 80k$ ,  $\mu_E^{int}$  is fixed to 0.5,  $\mu_E^{mar}$  increases from 0.1 to 1.5, and environment factor mean ratio increases from 0.2 to 3. In each panel, the top and bottom edges of the box plots represent the 25<sup>th</sup> and 75<sup>th</sup> percentiles of the estimate, and the horizontal middle line represents the 50<sup>th</sup> percentile. The vertical bars extend from the 25<sup>th</sup> (or 75<sup>th</sup>) percentile of  $\hat{\theta}$  to the minimum (or maximum) value of simulated data. The simulation results suggest that the direct estimate  $\hat{\beta}_3$  and MR-GxE estimate  $(\hat{\alpha} - \hat{\beta}_1 \hat{\theta}) / \mu_E^{mar}$  are all unbiased.

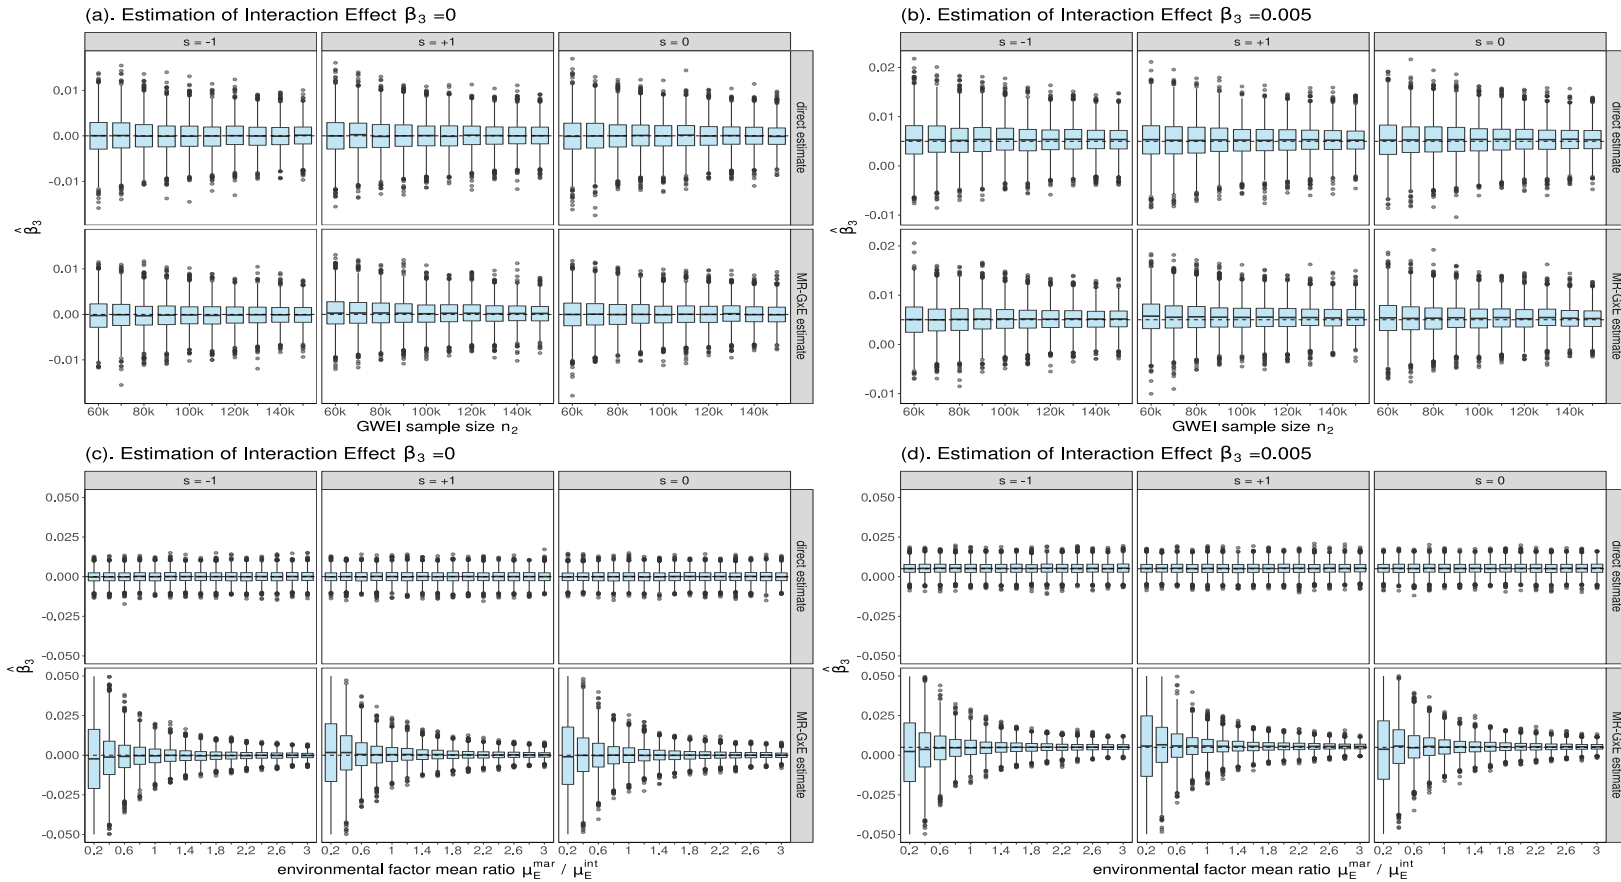

**Supplementary Figure 8.** The estimates of  $\theta$  and  $\beta_3$  when GWAS and GWIS are performed in different samples or the same samples. (a): estimate of  $\theta$ , left: there is no sample overlapping between GWAS and GWIS; right: GWAS and GWIS were performed in the sample. (b): direct estimate  $\hat{\beta}_3$  and MR-GxE estimate  $(\hat{\alpha} - \hat{\beta}_1 \hat{\theta}) / \mu_E^{mar}$  of interaction effect. Settings:  $n_1 = 200k$ ,  $n_2 = 80k$ ,  $n_0 = 0$  (0% sample overlap) or  $n_0 = 80k$  (100% sample overlap),  $\mu_E^{int} = 0.5$ ,  $\mu_E^{mar}$  increases from 0.32 to 2, and environment factor mean ratio increases from 0.64 to 4. In each panel. the top and bottom edges of the box plots represent the 25<sup>th</sup> and 75<sup>th</sup> percentiles of the estimate, and the horizontal middle line represents the 50<sup>th</sup> percentile. The vertical bars extend from the 25<sup>th</sup> (or 75<sup>th</sup>) percentile of  $\hat{\theta}$  to the minimum (or maximum) value of simulated data.

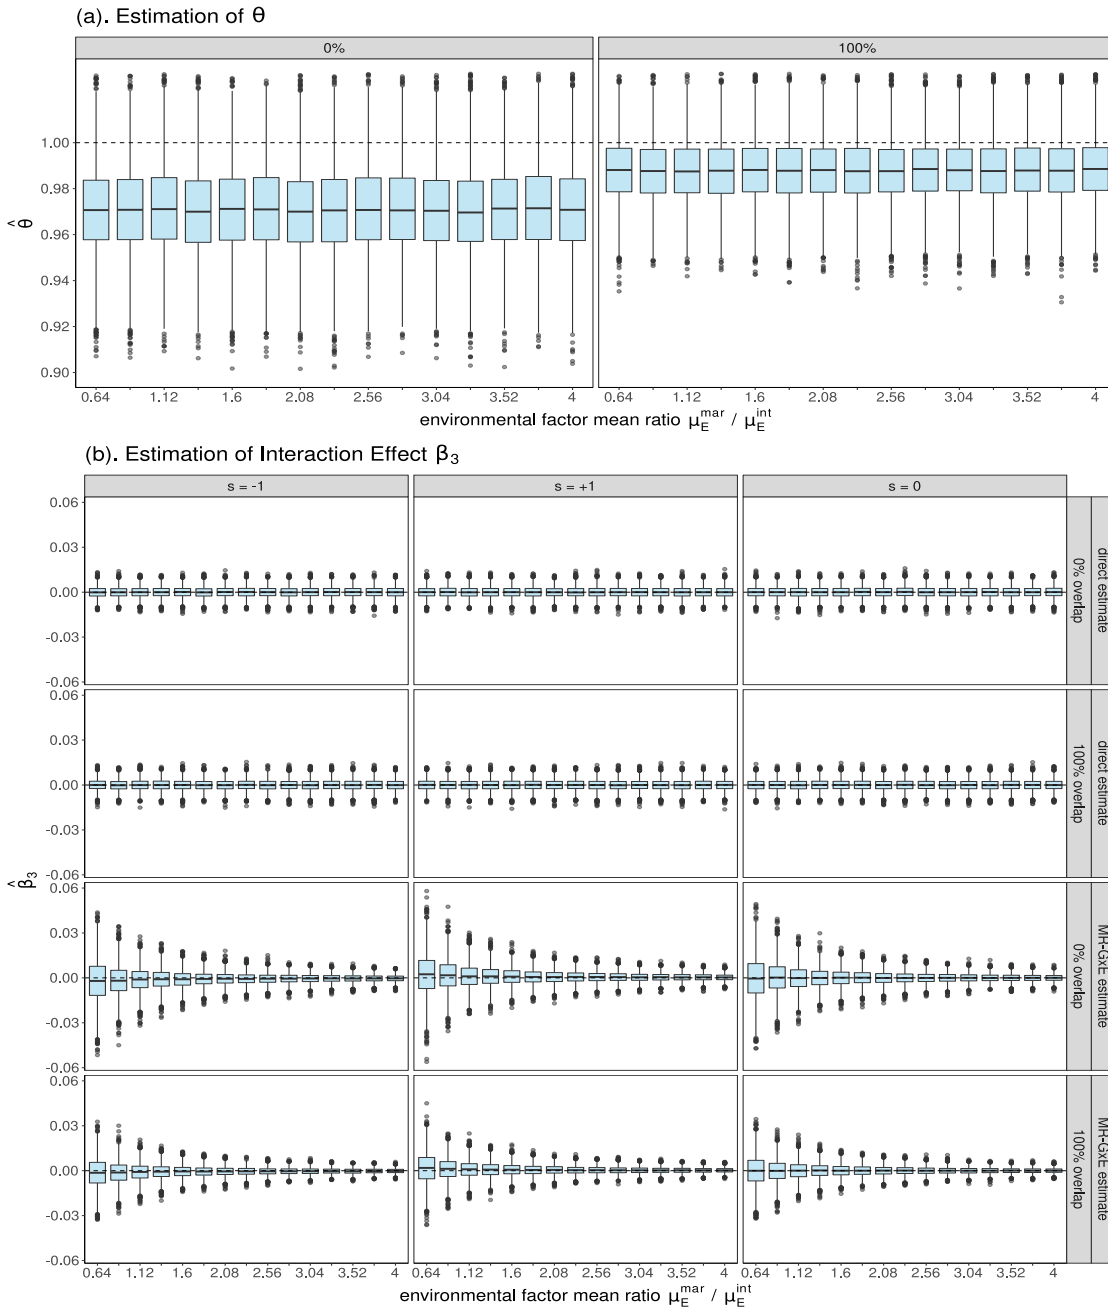



**Supplementary Figure 9.** (a): Type-I errors of direct test  $T_{direct}$  and MR-GxE test  $T_{MR-GxE}$ . The dash lines represent the 95% CI. b) Power of direct test  $T_{direct}$  and MR-GxE test  $T_{MR-GxE}$ . Settings:  $n_1 = 200k$ ,  $n_2 = 80k$ ,  $n_0 = 0$  (0% sample overlap) or  $n_0 = 80k$  (100% sample overlap),  $\mu_E^{int} = 0.5$ ,  $\mu_E^{mar}$  increases from 0.32 to 2, and environment factor mean ratio increases from 0.64 to 4.

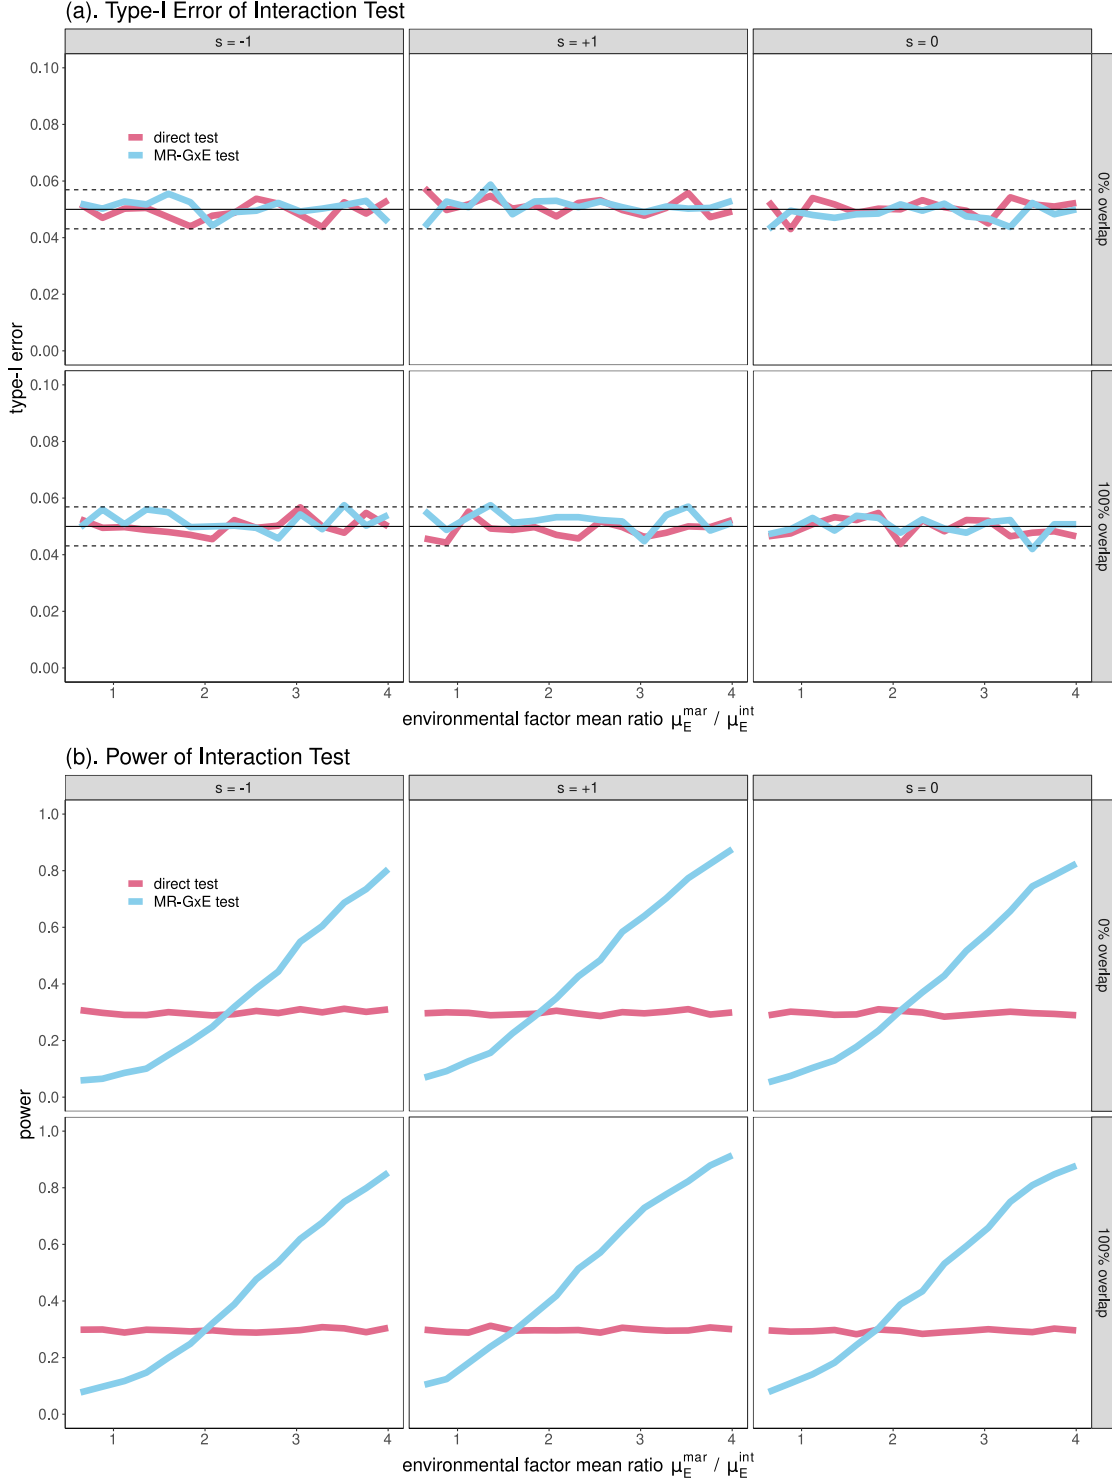

**Supplementary Figure 10.** Type I error and power for  $T_{Direct}$  (red),  $T_{MR_{GxE}}$  (green) and two-step (blue). In brief, we simulated a continuous trait, environmental factor and 20 independent genetic variants for 1000 times. The type I error and power for  $T_{Direct}$  and  $T_{MR_{GxE}}$  were calculate by correcting for 20 tests using the Bonferroni correction. The environment mean was set to 0.5. For the two-step procedure, we first applied  $T_{MR_{GxE}}$  and Bonferroni correction. The variants survived after  $T_{MR_{GxE}}$  were further tested by  $T_{Direct}$  and Bonferroni correction was also applied. The sample size for marginal effect estimation varied from  $n_2 = 20,000$  to 300,000. The sample size for the main effect estimate was fixed to  $n_2 = 20,000$ . **A.** All the variants have no contribution of either mediation or GxE interaction. **B.** One variant has mediation effect and accounts for 0.25% of environment variation, and E contributes 1% of phenotypic variation. **C.** One variant has mediation effect and accounts for 0.25% of environment variation, and E contributes 5% of phenotypic variation. The dash line represents the 5% typer I error rate. **D.** One variant has GxE interaction but no mediation. **E.** One variant has both mediation and GxE interaction. This variant accounts for 0.25% of environment variation, and E contributes 1% of phenotypic variation. **F.** One variant has both mediation and GxE interaction. This variant accounts for 0.25% of environment variation, and E contributes 5% of phenotypic variation. The simulations suggested the type I error rate is in general well controlled except when E has a large contribution to the phenotype when GWAS and GWIS are performed in the same dataset. Mediation effect improves the power to detect GxE for  $T_{Direct}$ ,  $T_{MR_{GxE}}$  and two-step, with more

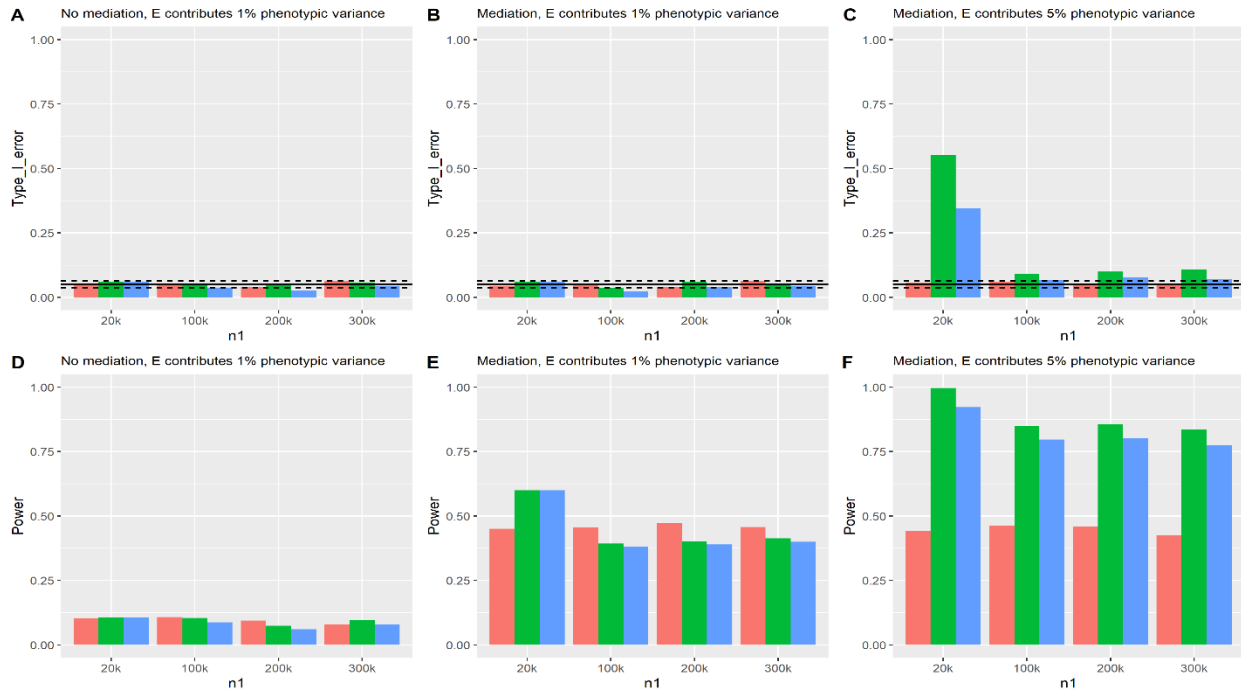

**Supplementary Figure 11.1.** Zoomed locus-specific plots for the GxE loci identified by  $T_{MR-GxE}$  for LDL-C. In each panel, top is  $-\log_{10}(P\text{-value})$  and bottom is the corresponding CADD and RegulomDB score generated by software FUMA. (a) *APOE/BCAM*, Current Drinking. (b) *SUGPI*, Current Drinking. (c) *SMARCA4*, Current drinking. (d) *APOB*, regular drinking. (e) *SMARCA4*, Regular drinking. (f) *SUGPI*, Regular Drinking. (g) *APOE/BCAM*, Regular Drinking.

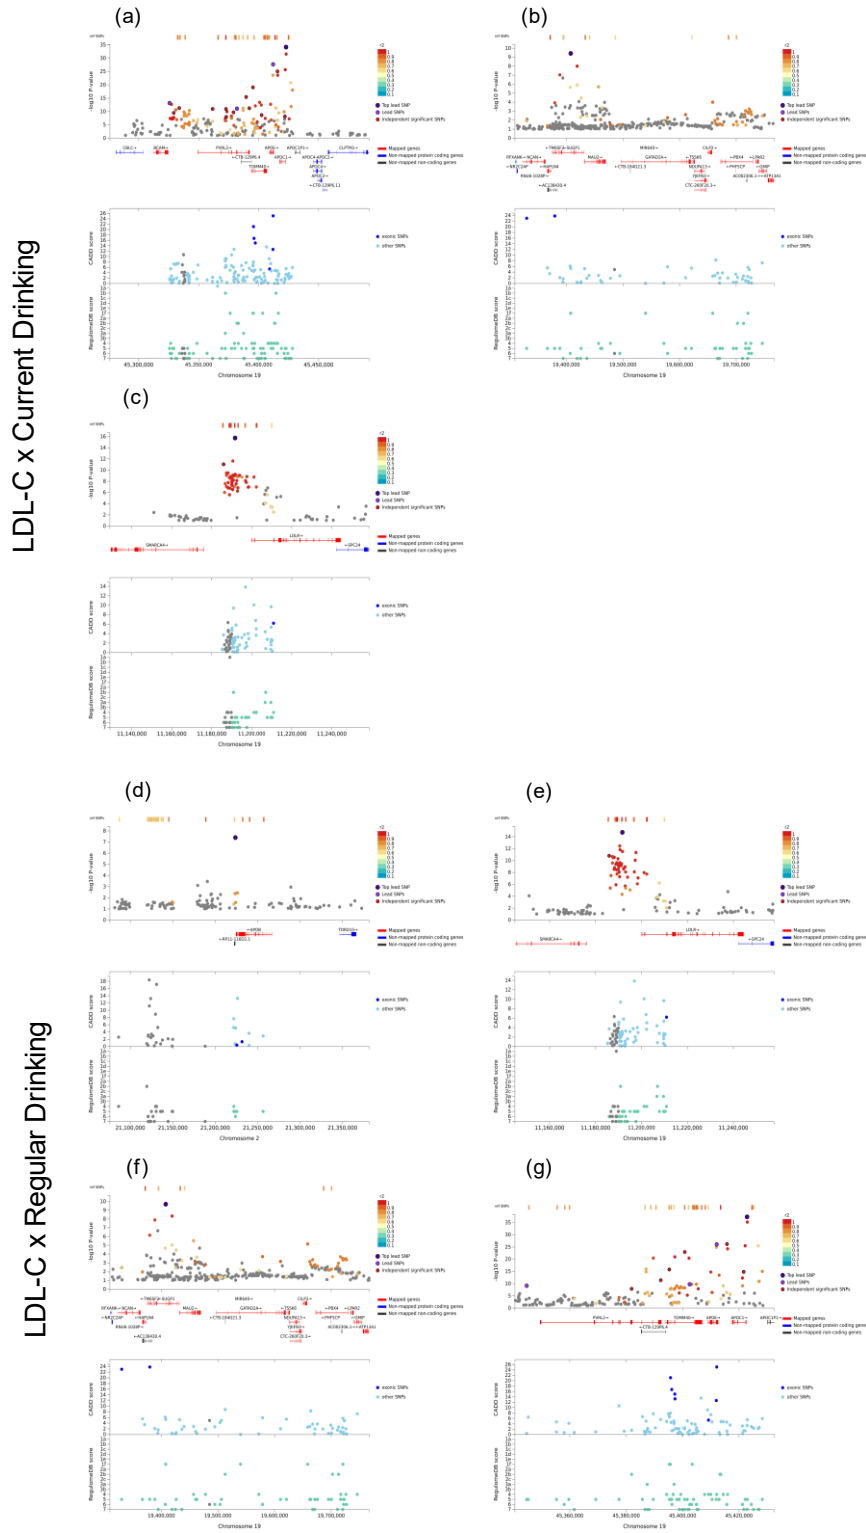

**Supplementary Figure 11.2.** Zoomed locus-specific plots for the GxE loci identified by  $T_{MR-GxE}$  for LDL-C. In each panel, top is  $-\log_{10}(P\text{-value})$  and bottom is the corresponding CADD and RegulomDB score generated by software FUMA. (a) *SMARCA4*, Current Smoking. (b) *SUGP1*, Current Smoking. (c) AC008897.2, Current smoking. (d) *APOE*, current smoking. (e) *CELSR2/PSRC1*, Ever Smoking. (f) *APOE/BCAM*, Ever Smoking. (g) *SMARCA4*, Ever Smoking.

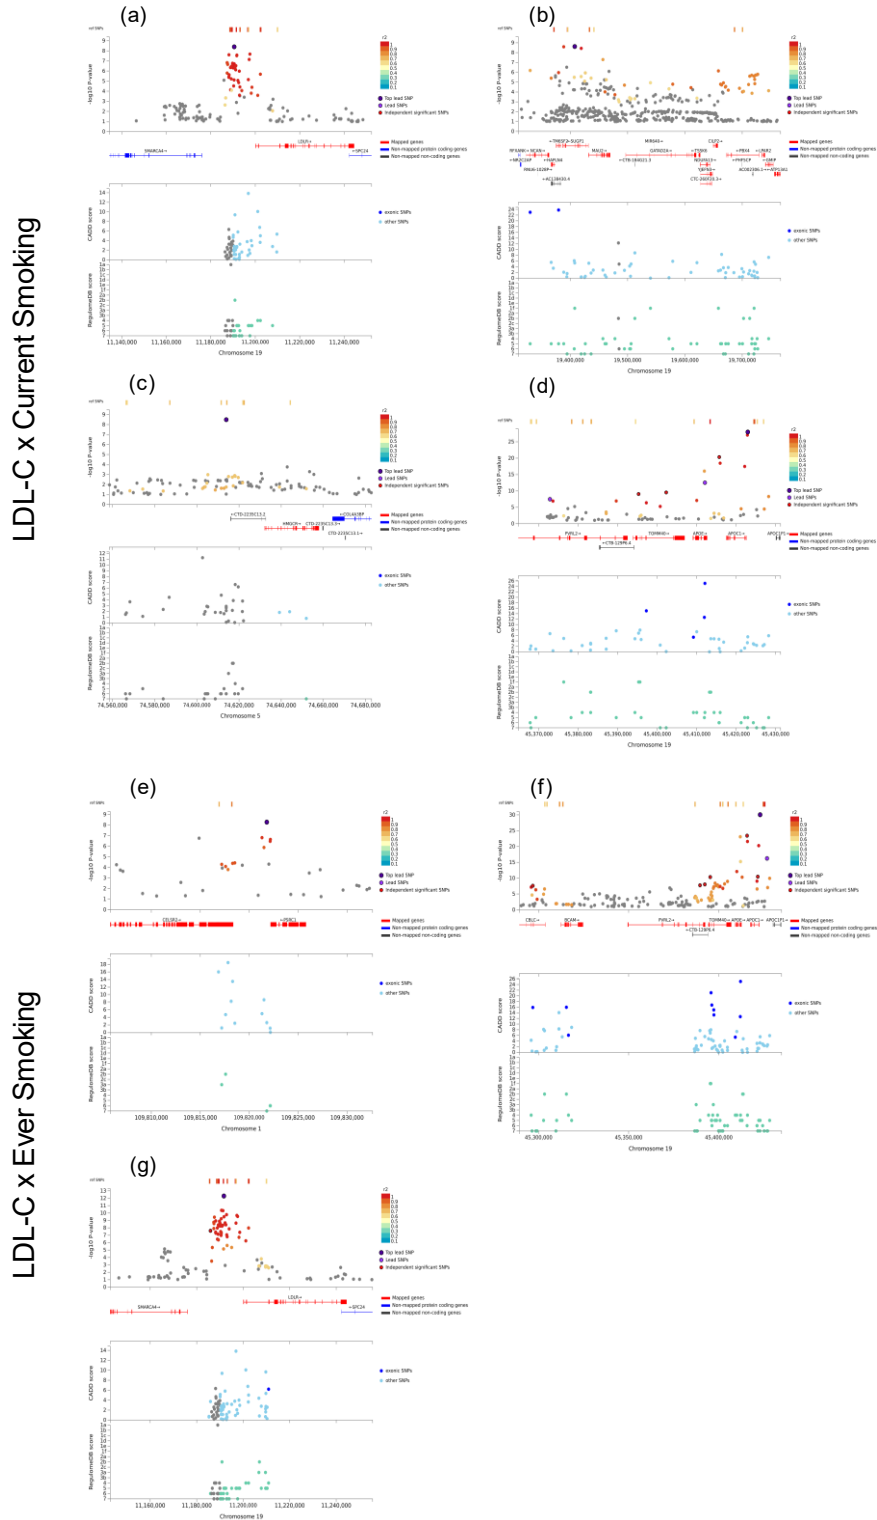

**Supplementary Figure 11.3.** Zoomed locus-specific plots for the GxE loci identified by  $T_{MR-GxE}$  for HDL-C. In each panel, top is  $-\log_{10}(P\text{-value})$  and bottom is the corresponding CADD and RegulomDB score generated by software FUMA. (a) *LIPC/ALDH1A2*, Current Drinking. (b) *DDX28/DUS2/NFATC3*, Current Drinking (c) *CETP*, Current Drinking. (d) *GALNT2*, Current drinking. (e) *RPL5P26*, regular drinking. (f) *LIPC/ALDH1A2*, Regular drinking. (g) *CETP*, Regular Drinking. (h) *LPL*, Regular Drinking.

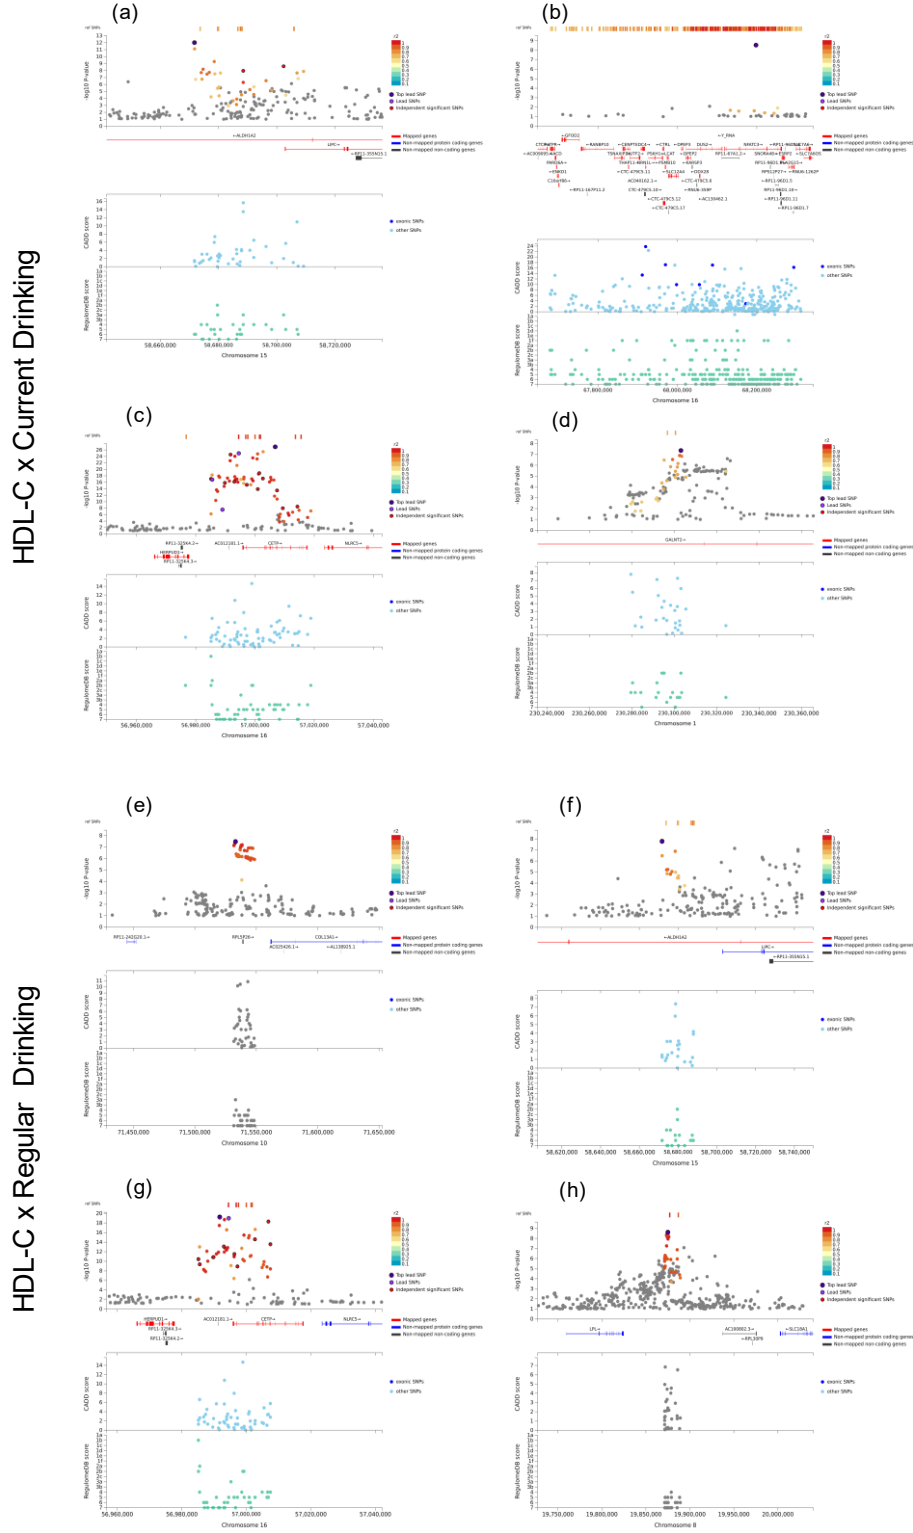



**Supplementary Figure 11.5.** Zoomed locus-specific plots for the GxE loci identified by  $T_{MR-GxE}$  for HDL-C. In each panel, top is  $-\log_{10}(P\text{-value})$  and bottom is the corresponding CADD and RegulonDB score generated by software FUMA. (a) *LIPC/ALDH1A2*, Ever Smoking. (b) *DDX28/DUS2/NFATC3*, Ever smoking. (c) *LPL*, Ever smoking. (d) *CETP*, ever smoking.

HDL-C x Ever Smoking

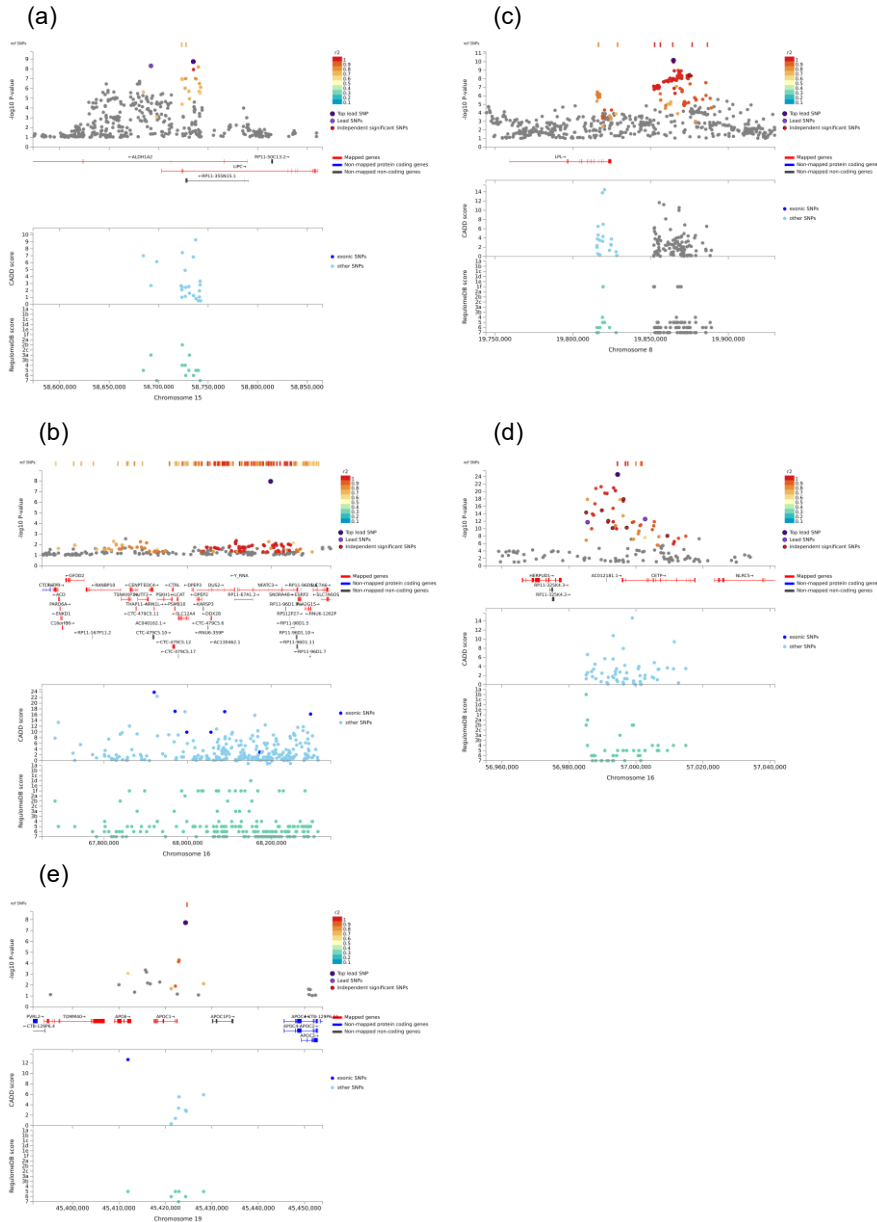

**Supplementary Figure 11.6.** Zoomed locus-specific plots for the GxE loci identified by  $T_{MR-GxE}$  for TG. In each panel, top is  $-\log_{10}(P\text{-value})$  and bottom is the corresponding CADD and RegulomDB score generated by software FUMA. (a) *LPL*, Current Drinking. (b) *BUD13*, Current Drinking (c) *APOE/APOC1*, Current Drinking. (d) *AC091114.1*, Regular drinking. (e) *BUD13*, regular drinking. (f) *APOE/APOC1*, Regular drinking. (g) *LPL*, Regular Drinking.

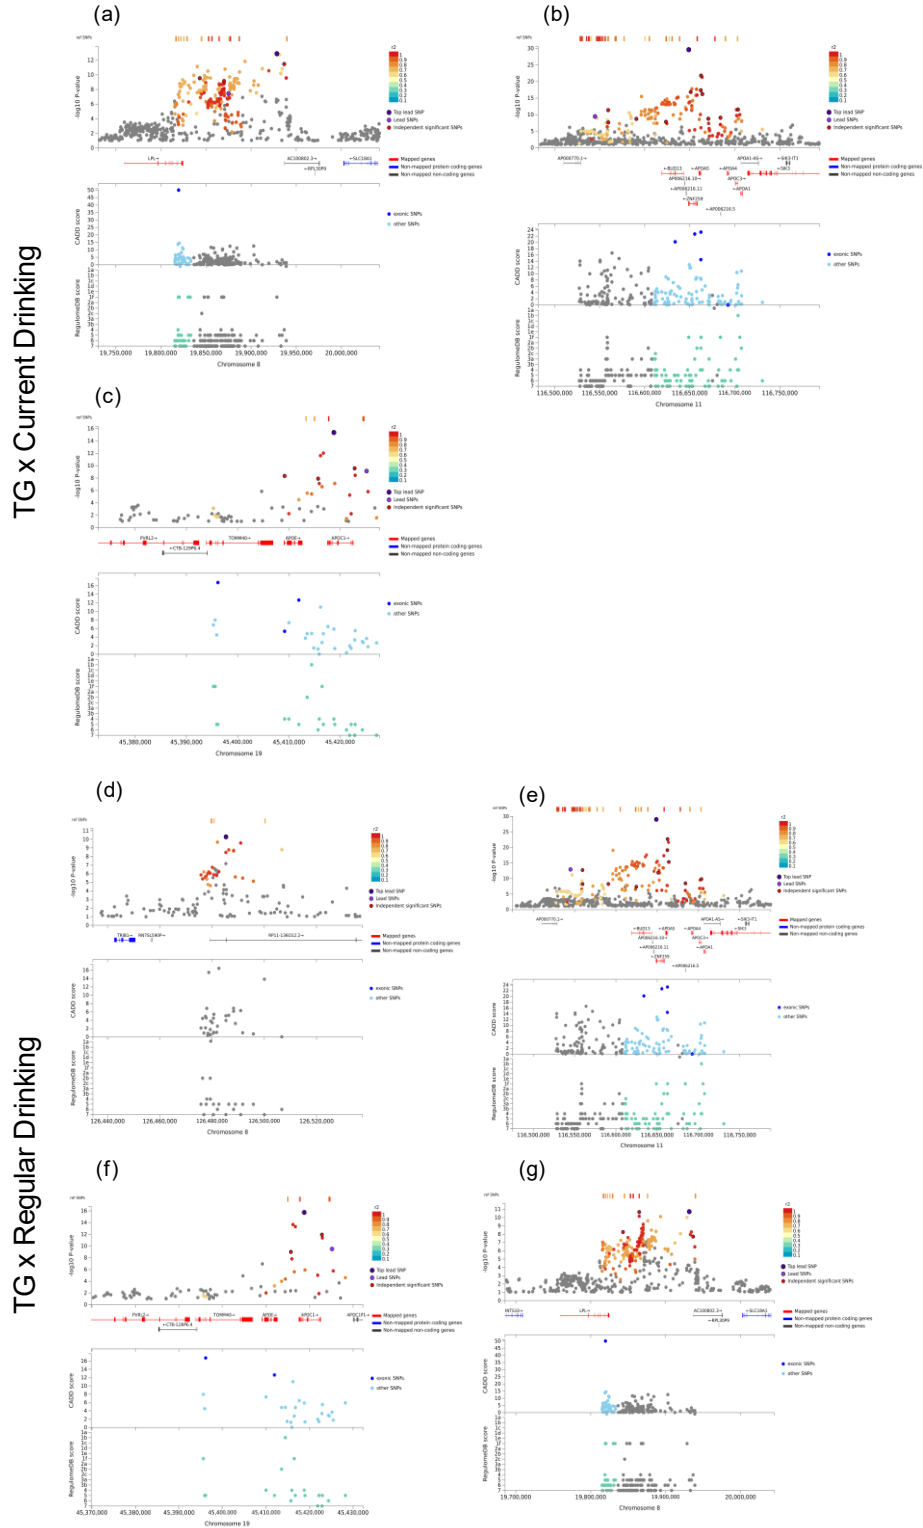



**Supplementary Figure 11.7.** Zoomed locus-specific plots for the GxE loci identified by  $T_{MR-GxE}$  for TG. In each panel, top is  $-\log_{10}(P\text{-value})$  and bottom is the corresponding CADD and RegulomDB score generated by software FUMA. (a) *ZNF512*, Current Smoking. (b) *AC091114.1*, Current Smoking (c) *BUD13*, Current Smoking (d) *LPL*, Current Smoking. (e) *APOE/APOC1*, Current Smoking.

TG x Current Smoking

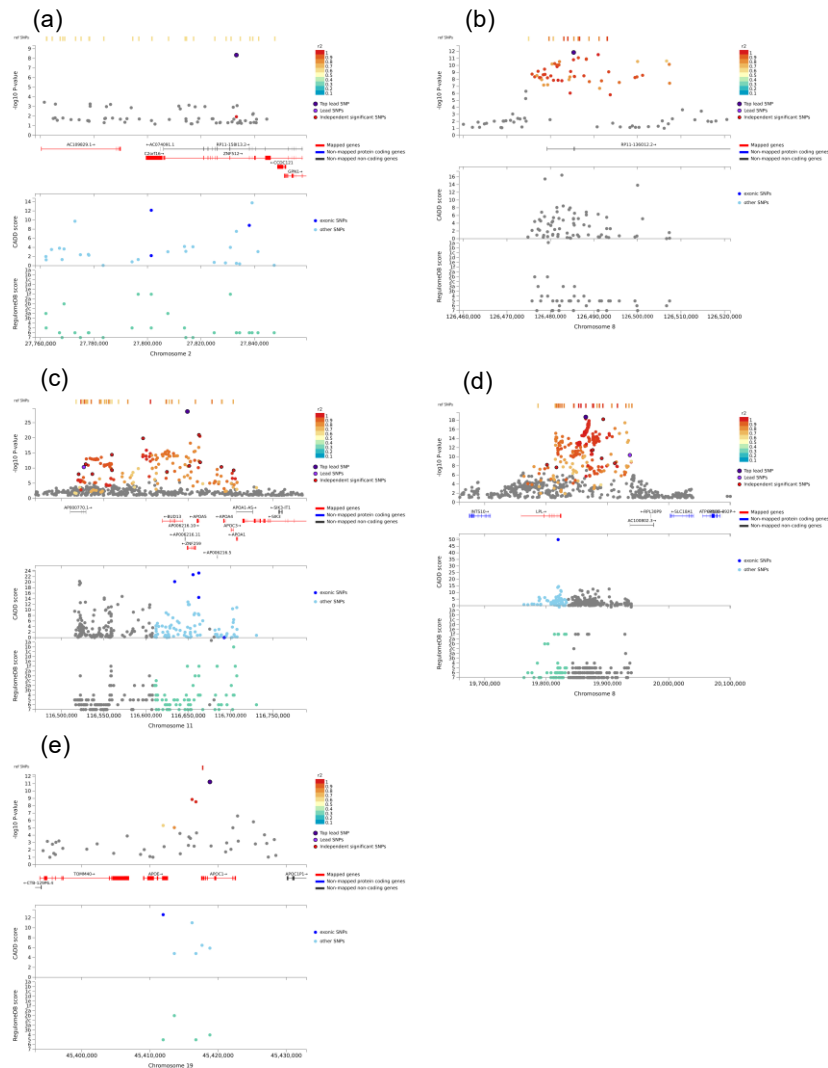

**Supplementary Figure 11.8.** Zoomed locus-specific plots for the GxE loci identified by  $T_{MR-GxE}$  for TG. In each panel, top is  $-\log_{10}(P\text{-value})$  and bottom is the corresponding CADD and RegulomDB score generated by software FUMA. (a) *BUD13*, Ever Smoking. (b) *APOE/APOC1*, Ever Smoking. (c) *AC091114.1*, Ever Smoking. (d) *LPL*, Ever Smoking.

TG x Ever Smoking

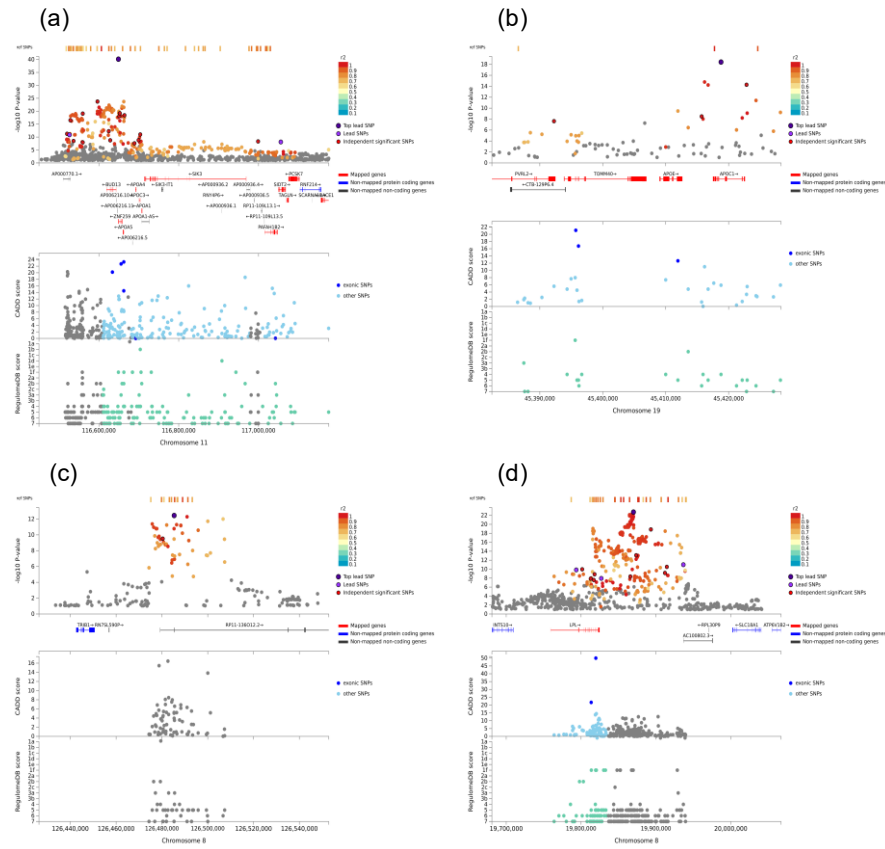

Supplementary Figure 12. The circle Manhattan plots of  $G \times E$  by  $T_{MR G \times E}$  for LDL-C, HDL-C and TG in ancestry specific analysis.

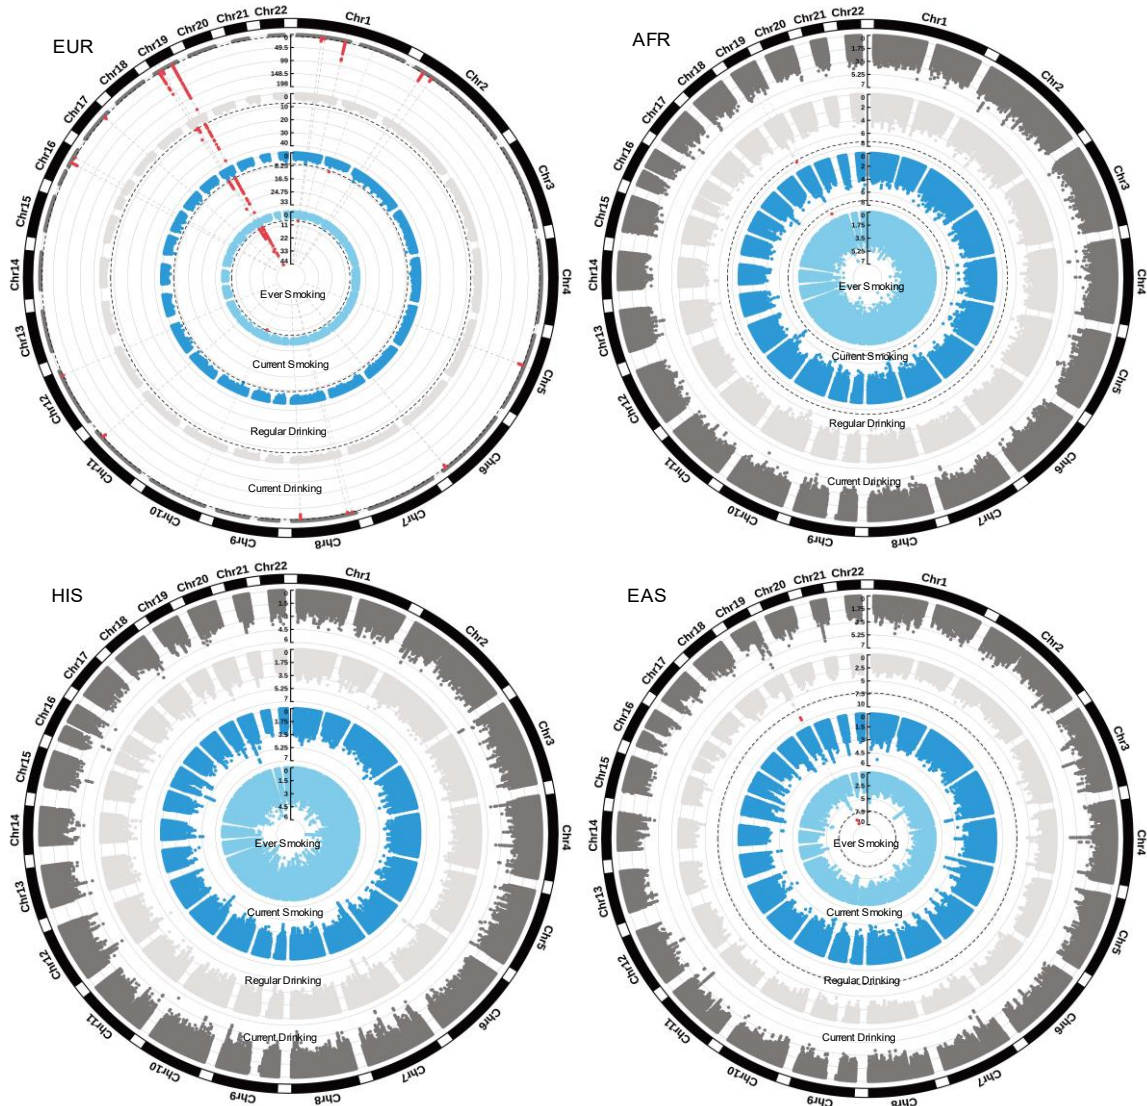

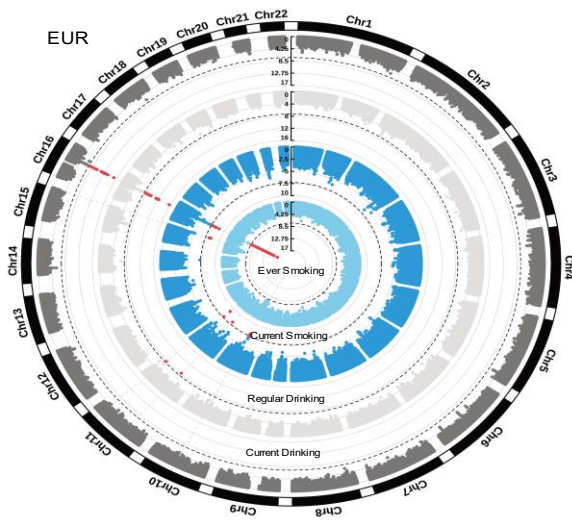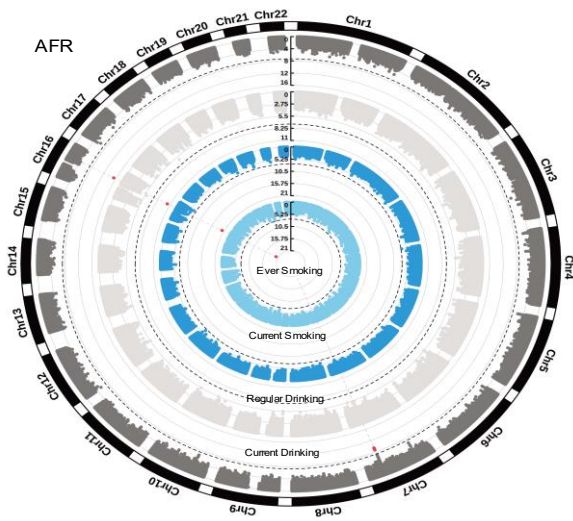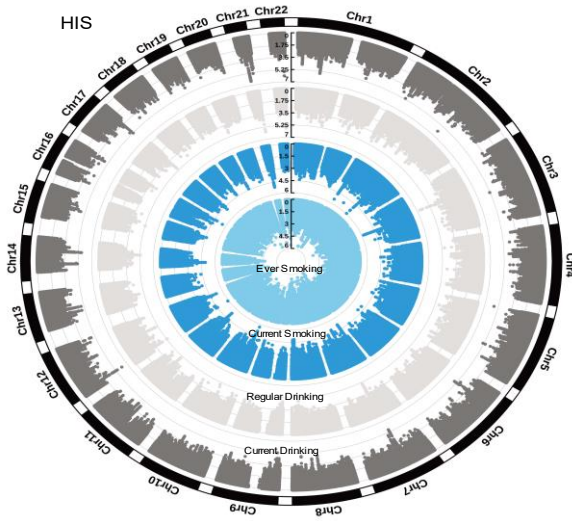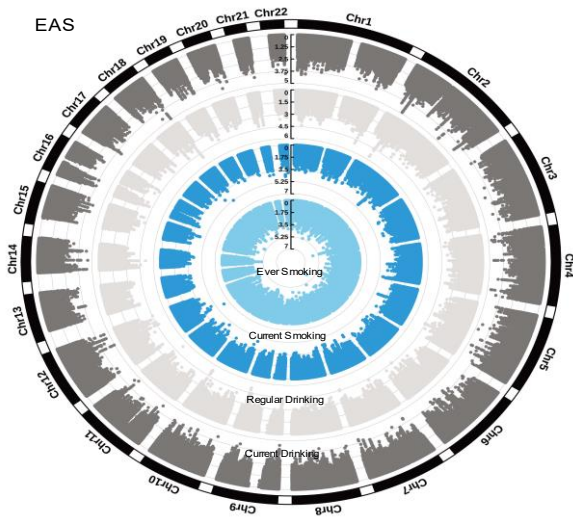

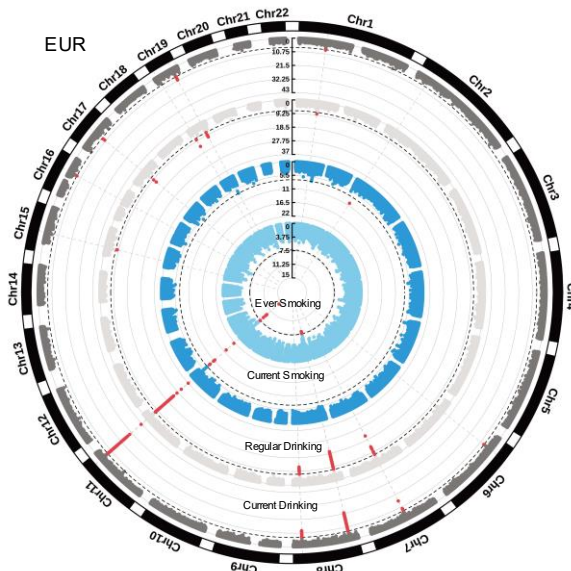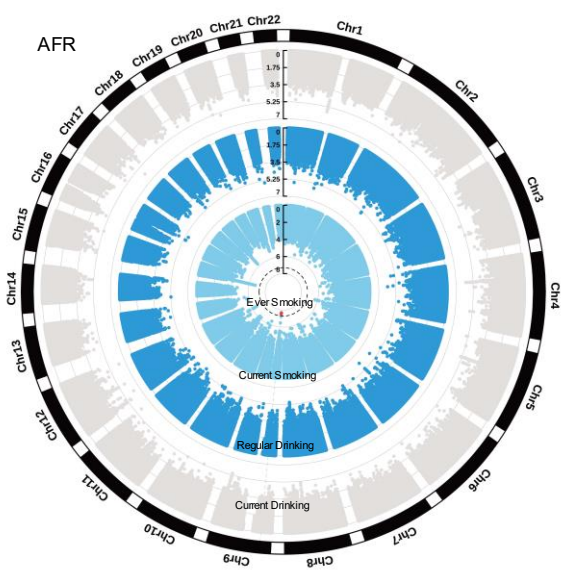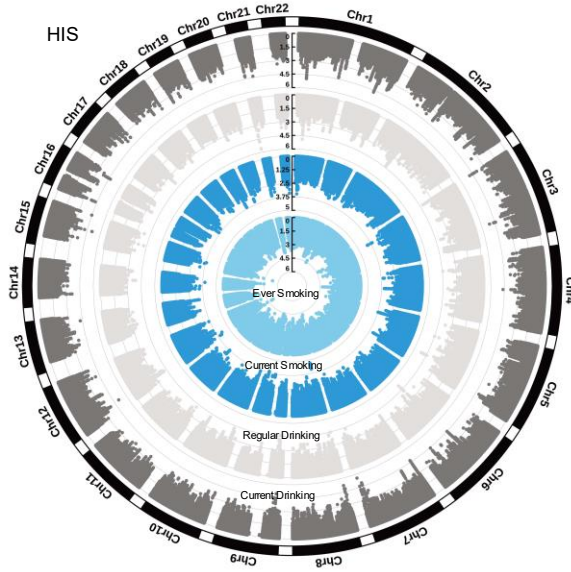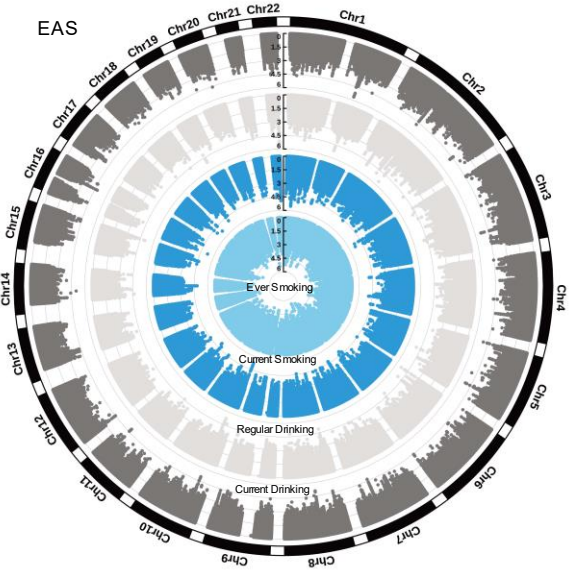

**Supplementary Figure 13.1.** (a)-(b): the MAGMA tissue enrichment analysis across 30 general tissue types and 54 specific tissue types from GTEx, respectively, for LDL-C and Current Drinking based on  $T_{MR-GxE}$  test; (c)-(d): Differentially expressed genes across 30 general tissue types and 54 specific tissue types, respectively, for LDL-C and Current Drinking based on  $T_{MR-GxE}$  test. (e)-(h): the counterparts of (a)-(d) for LDL-C and Regular Drinking.

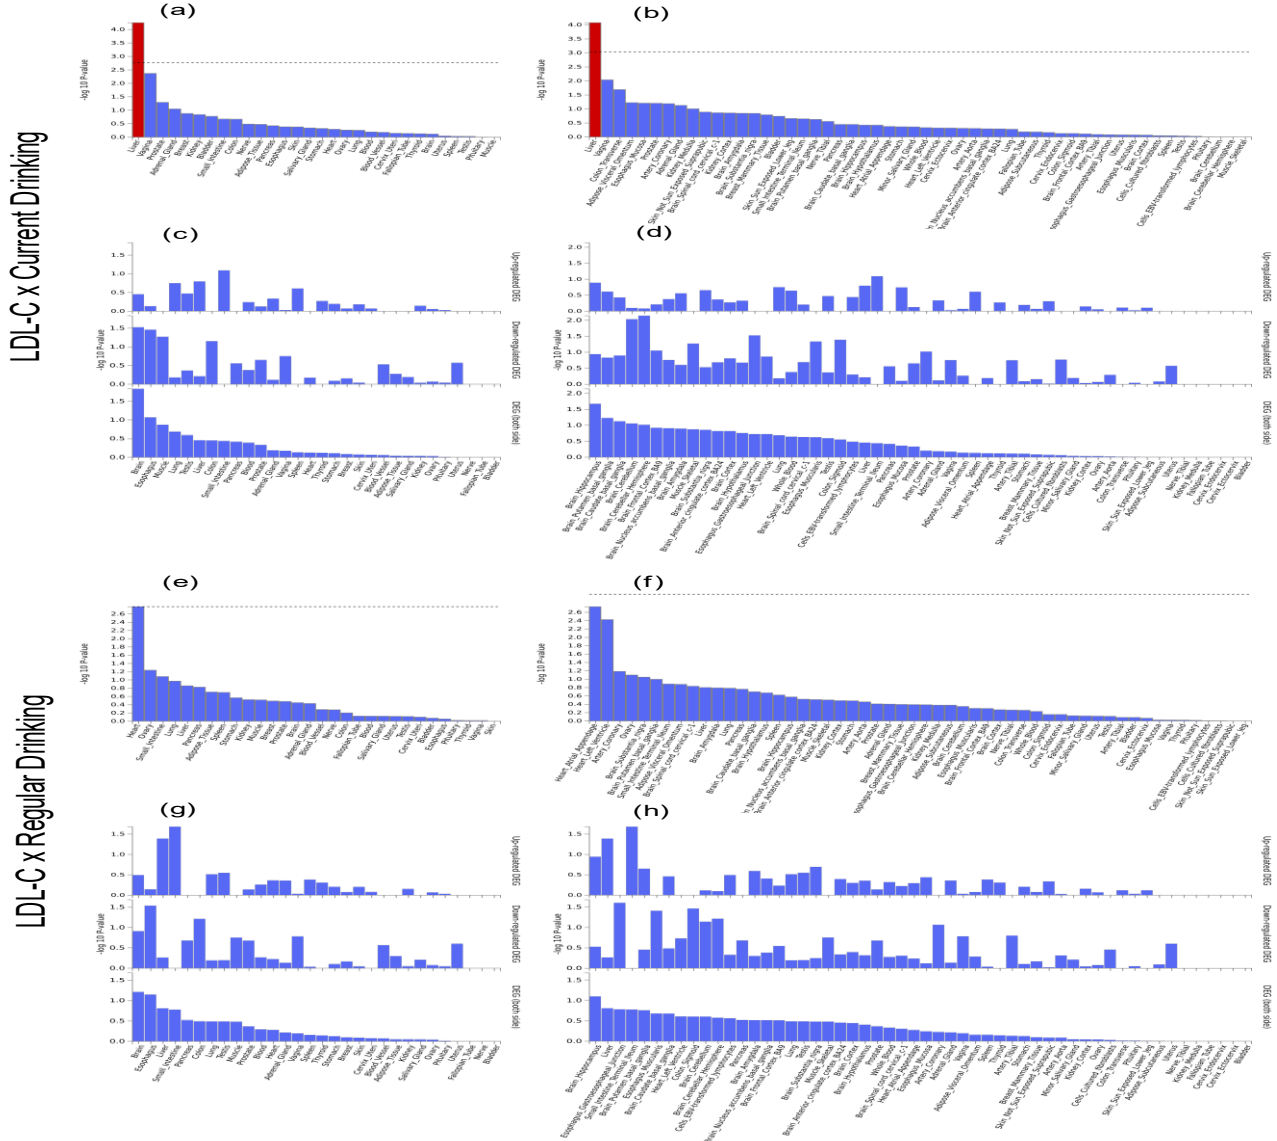



**Supplementary Figure 13.3.** (a)-(b): the MAGMA tissue enrichment analysis across 30 general tissue types and 54 specific tissue types from GTEx, respectively, for HDL-C and Current Drinking based on  $T_{MR-GXE}$  test; (c)-(d): Differentially expressed genes across 30 general tissue types and 54 specific tissue types, respectively, for HDL-C and Current Drinking based on  $T_{MR-GXE}$  test. (e)-(h): the counterparts of (a)-(d) for HDL-C and Regular Drinking.

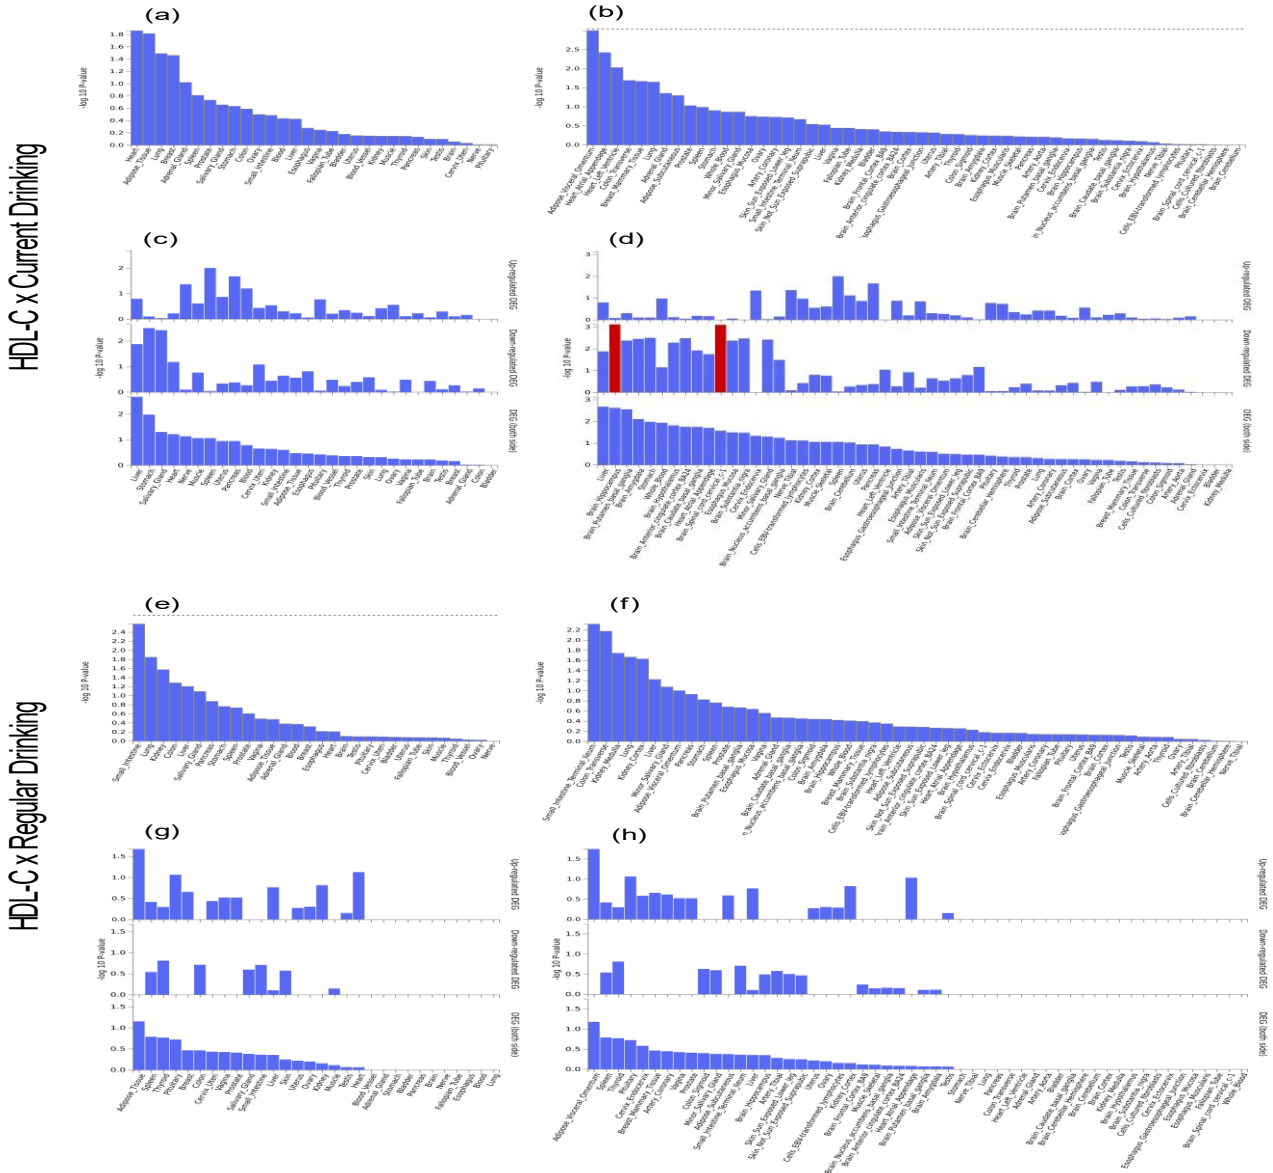



**Supplementary Figure 13.4.** (a)-(b): the MAGMA tissue enrichment analysis across 30 general tissue types and 54 specific tissue types from GTEx, respectively, for HDL-C and Current smoking based on  $T_{MR-GXE}$  test; (c)-(d): Differentially expressed genes across 30 general tissue types and 54 specific tissue types, respectively, for HDL-C and Current smoking based on  $T_{MR-GXE}$  test. (e)-(h): the counterparts of (a)-(d) for HDL-C and Ever Smoking, respectively.

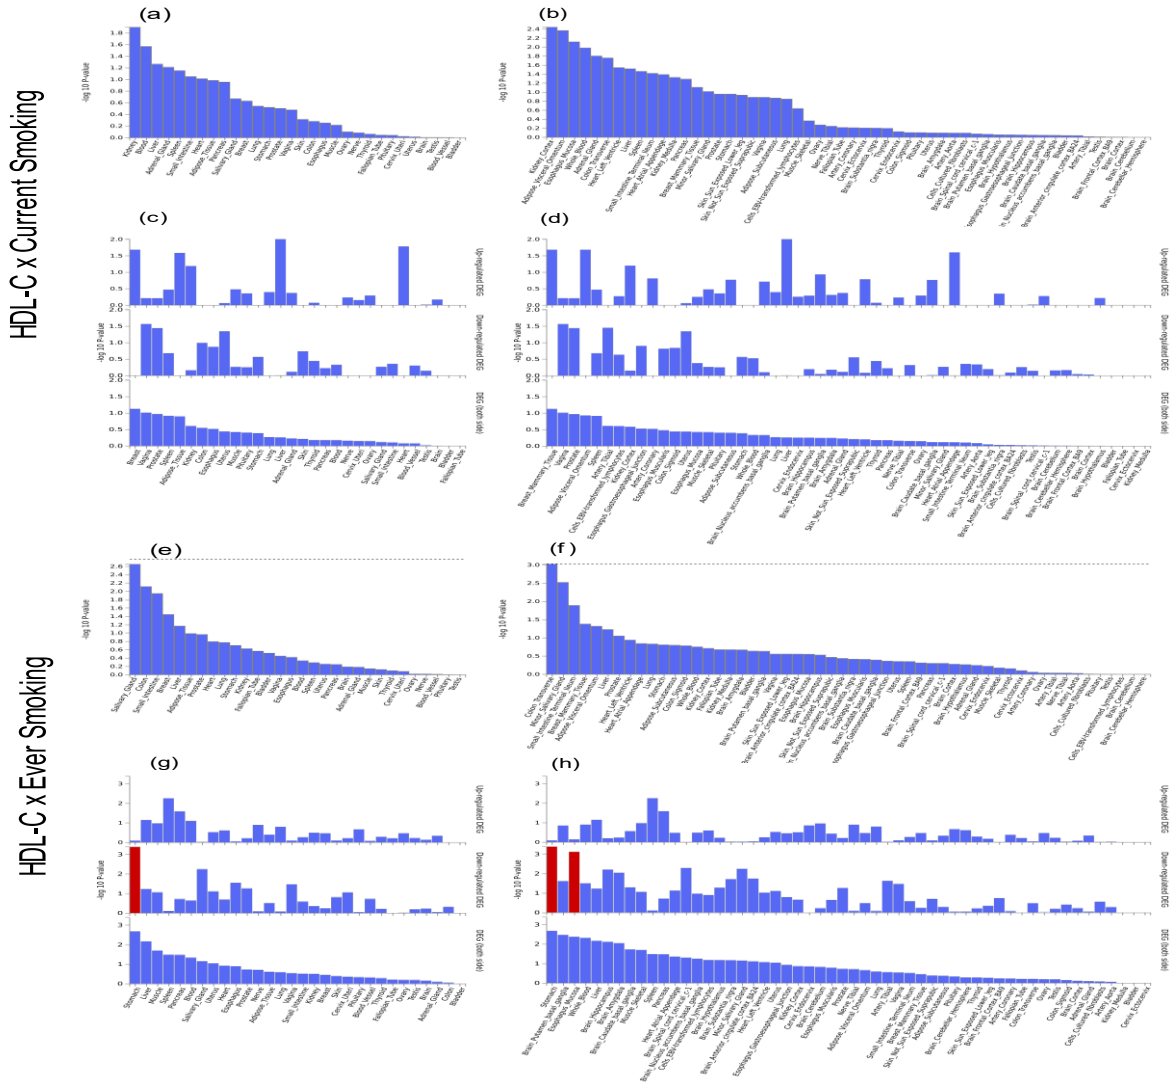

**Supplementary Figure 13.5.** (a)-(b): the MAGMA tissue enrichment analysis across 30 general tissue types and 54 specific tissue types from GTEx, respectively, for TG and Current Drinking based on  $T_{MR-GxE}$  test; (c)-(d): Differentially expressed genes across 30 general tissue types and 54 specific tissue types, respectively, for TG and Current Drinking based on  $T_{MR-GxE}$  test. (e)-(h): the counterparts of (a)-(d) for TG and Regular Drinking.

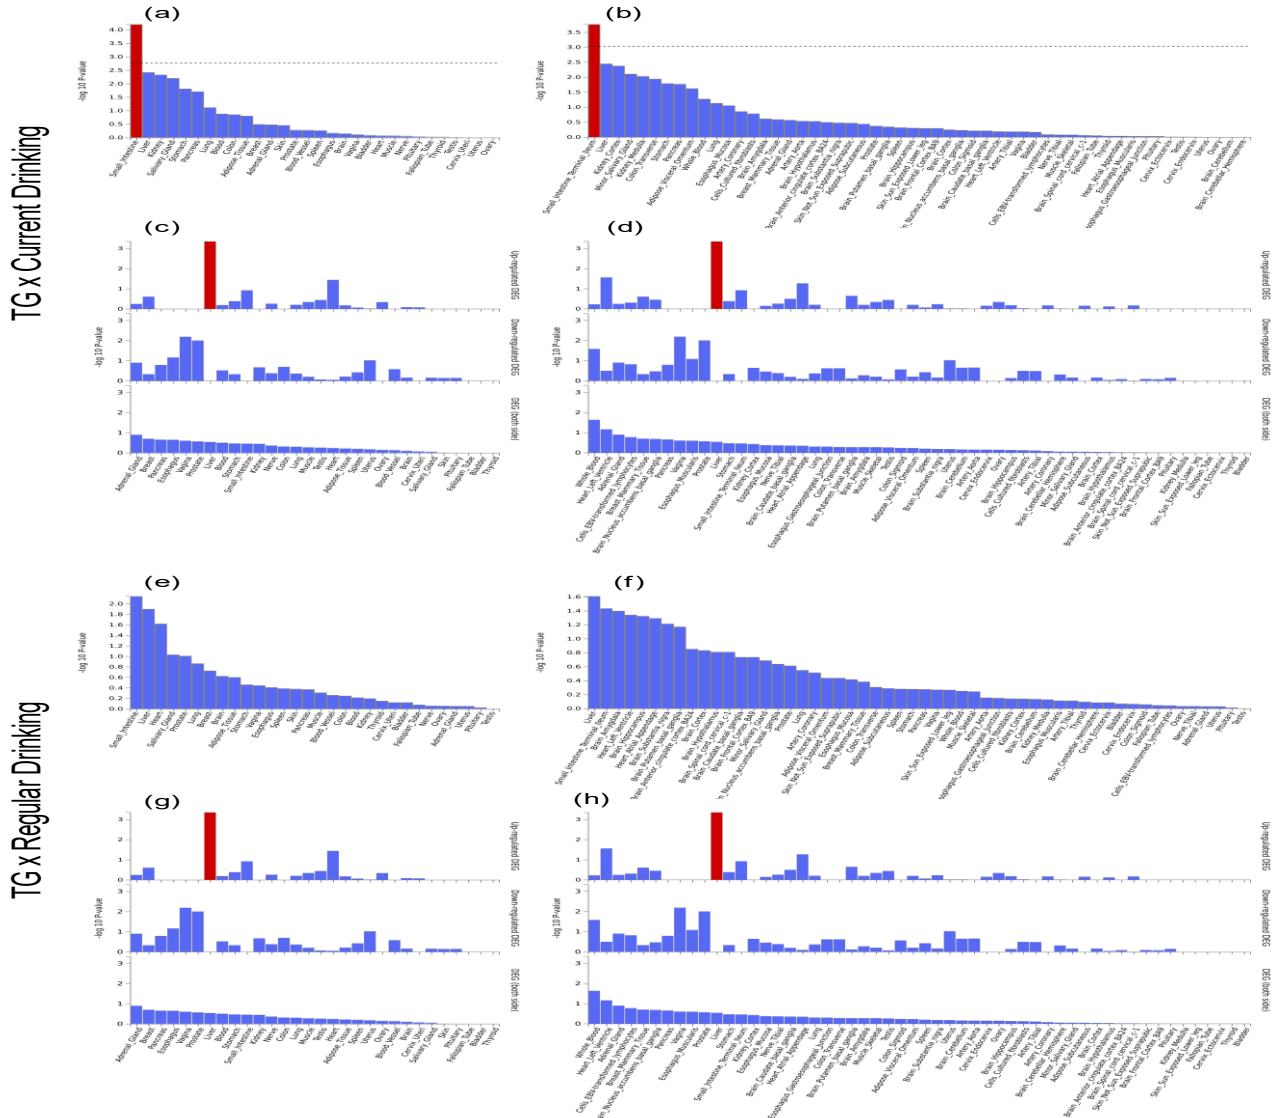

**Supplementary Figure 13.6.** (a)-(b): the MAGMA tissue enrichment analysis across 30 general tissue types and 54 specific tissue types from GTEx, respectively, for TG and Current Smoking based on  $T_{MR-GxE}$  test; (c)-(d): Differentially expressed genes across 30 general tissue types and 54 specific tissue types, respectively, for TG and Current Smoking based on  $T_{MR-GxE}$  test. (e)-(h): the counterparts of (a)-(d) for TG and Ever Smoking.

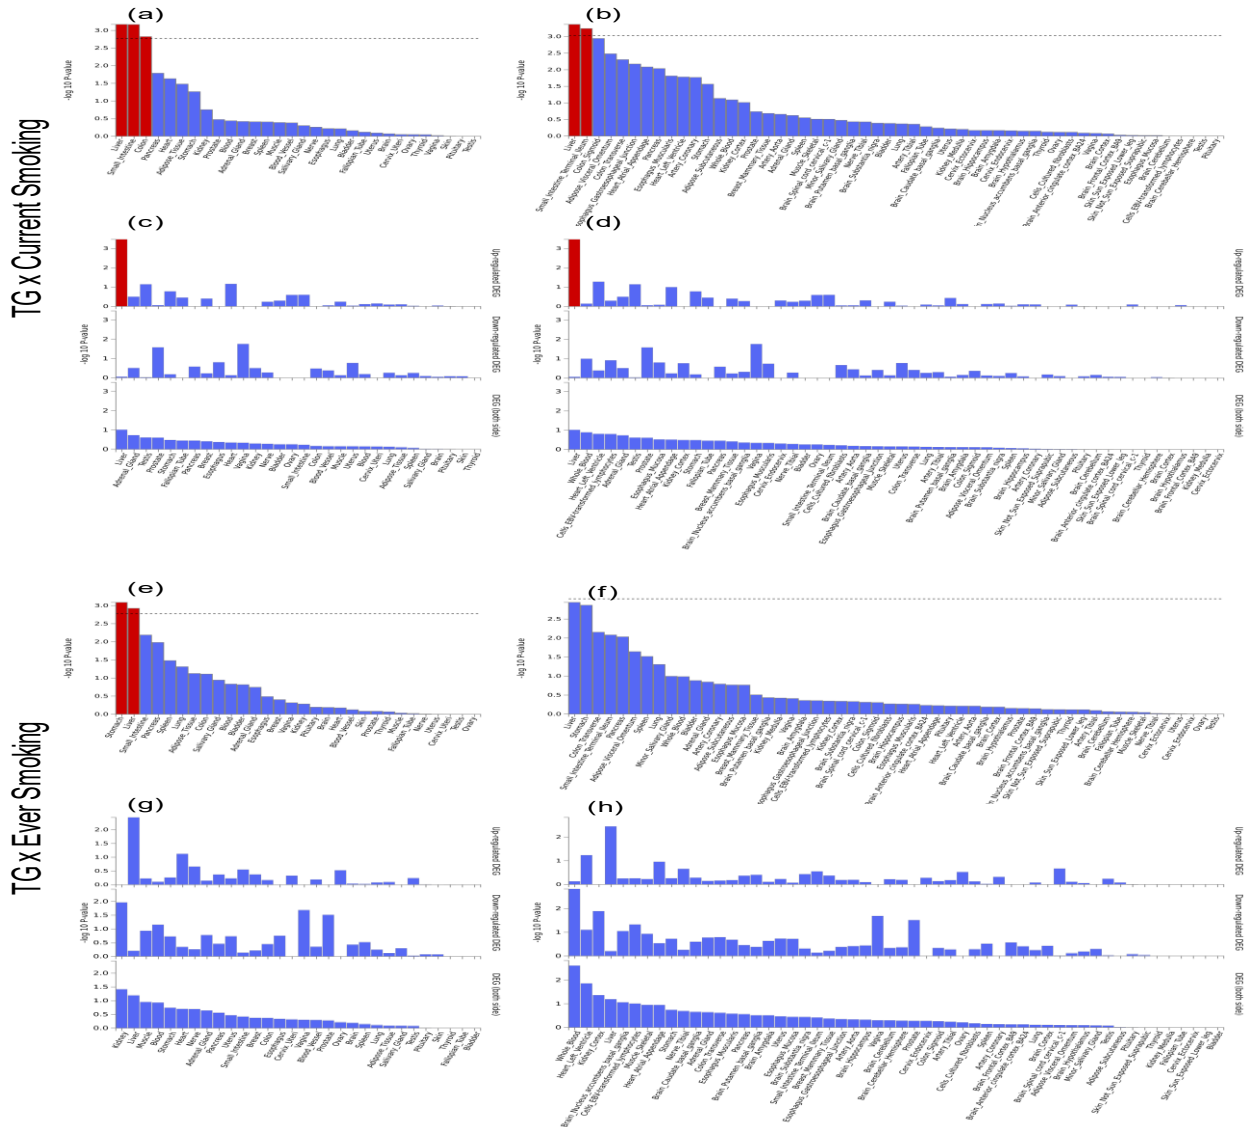

**Supplementary Figure 14.** Colocalization between TM6SF2 gene and LDL-C x Current Smoking in Lung tissue. rs1009136 is a potential causal SNP with CLPP 0.5216.

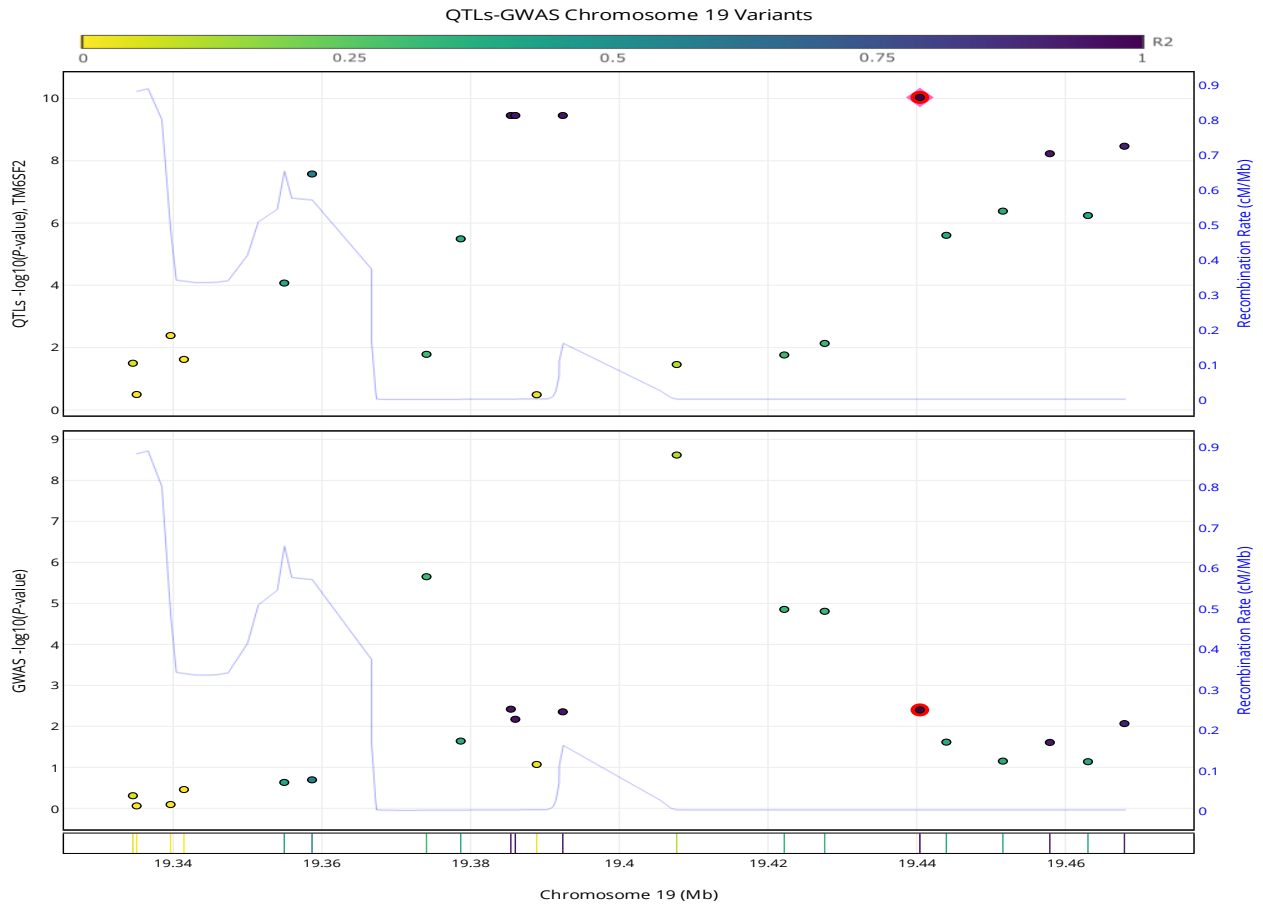

Colocalization between MAU2 gene and LDL-C x Current Drinking in Liver tissue. rs10401969 is a potential causal SNP with CLPP 0.8211.

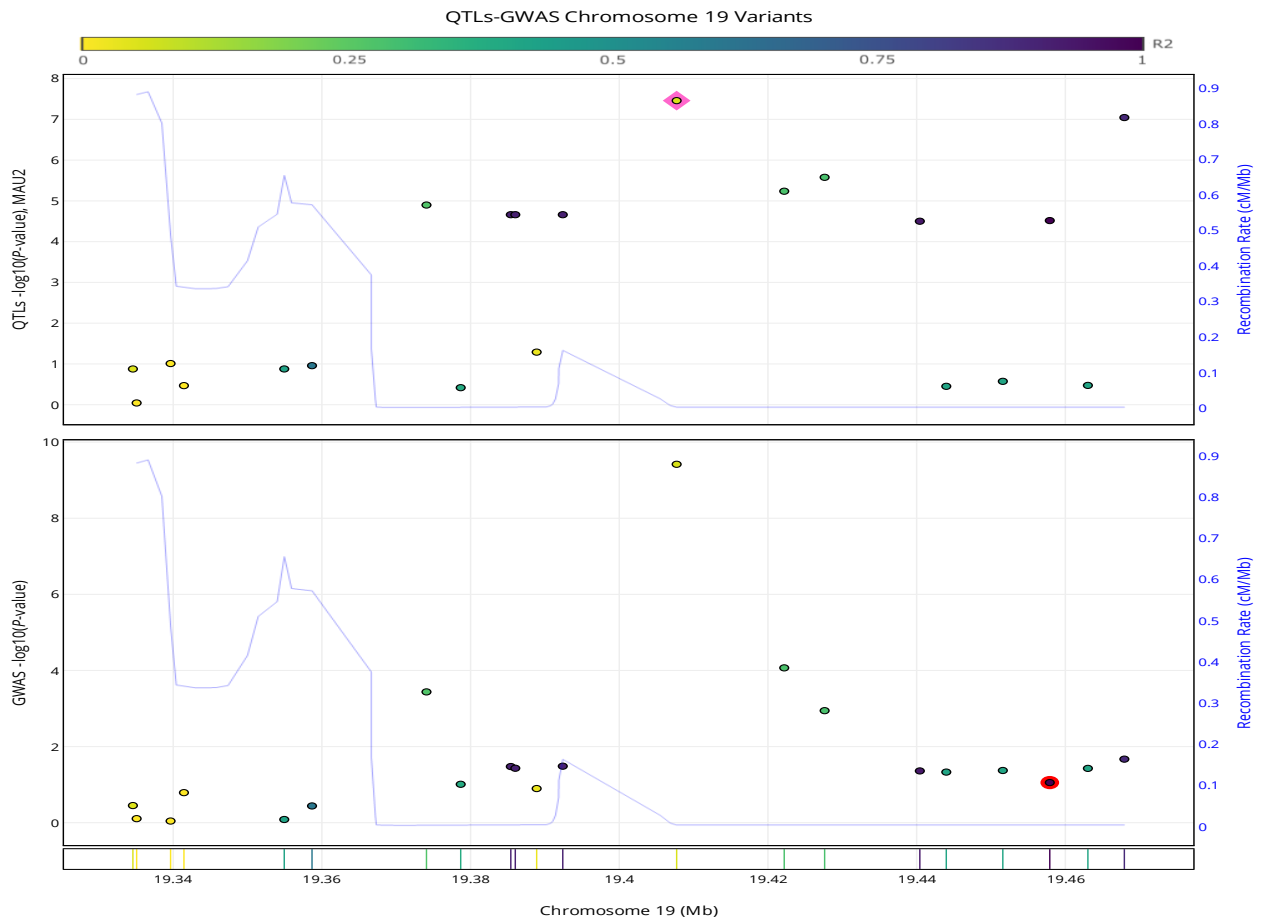

Colocalization between OPA3 gene and LDL-C x Current Drinking in Liver tissue. rs4420638 is a potential causal SNP with CLPP 0.3284.

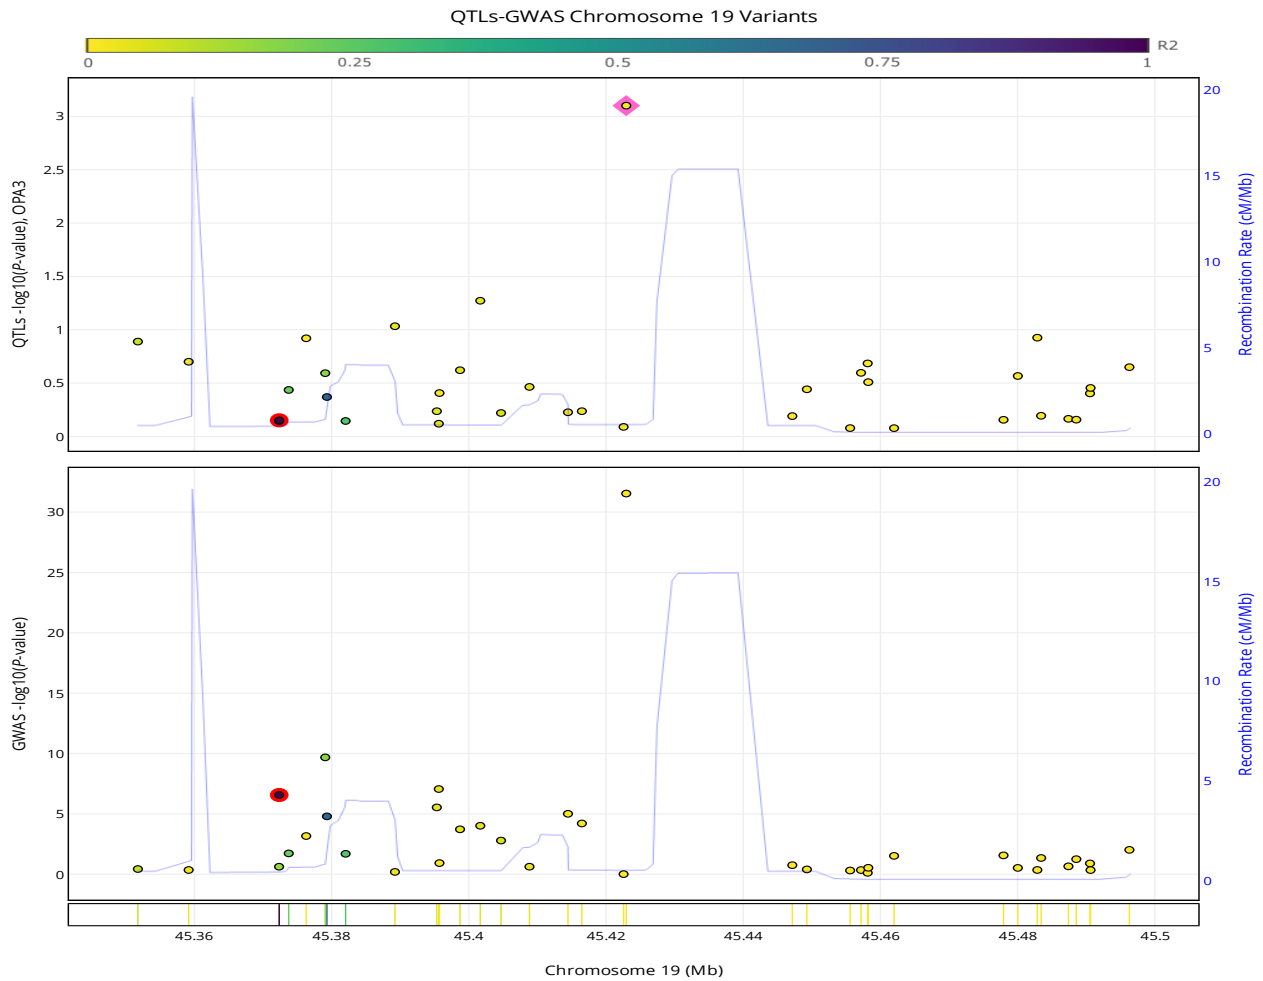

Colocalization between APOC1P1 gene and TG x Regular Drinking in Liver tissue. rs584007 is a potential causal SNP with CLPP 0.1479.

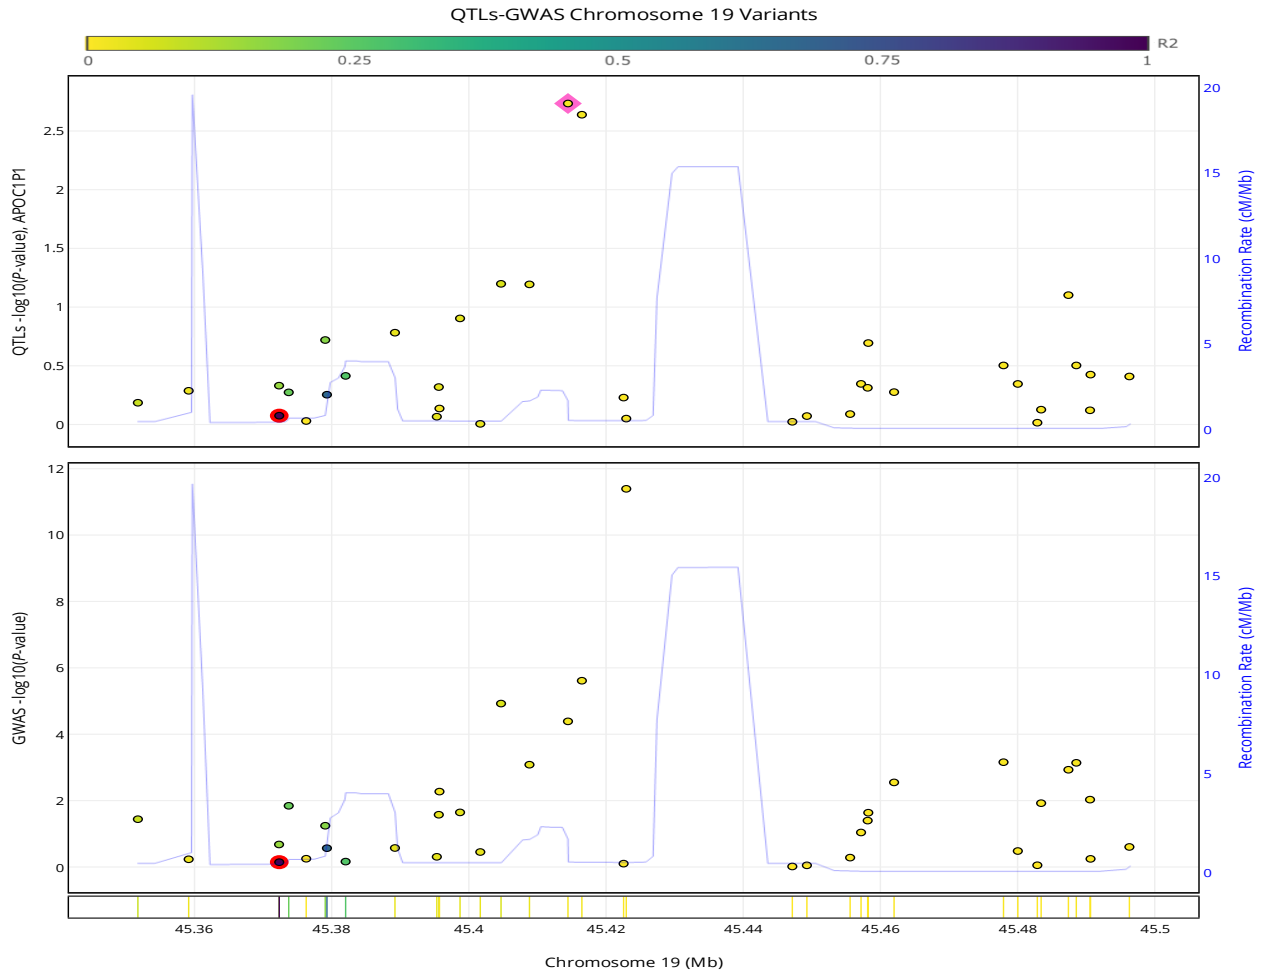

Colocalization between APOC1P1 gene and TG x Current Drinking in Liver tissue. rs584007 is causal SNP with CLPP 0.1459

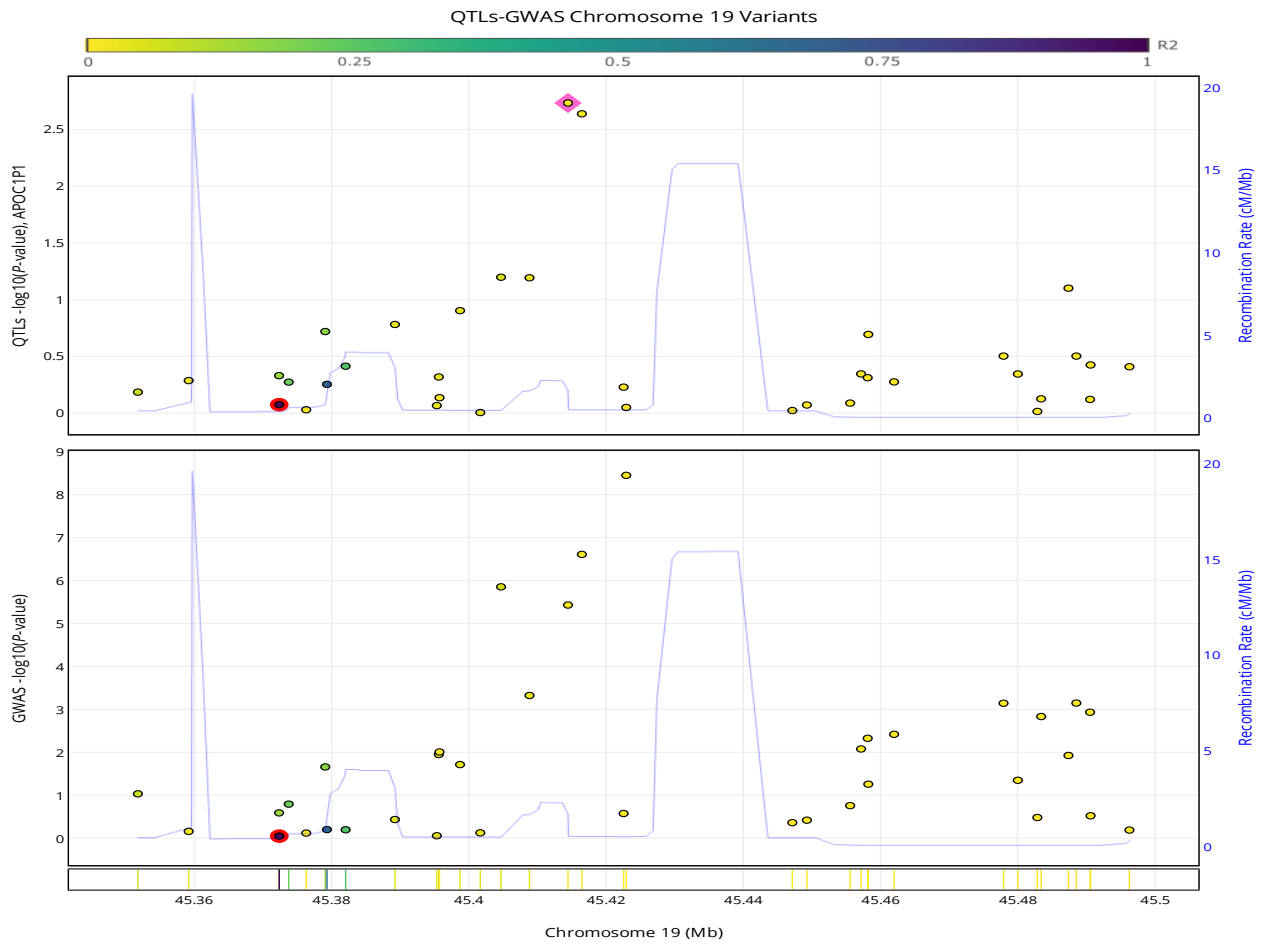



Colocalization between MT1DP gene and TG x Current Drinking in Liver tissue.  
rs584007 is causal SNP with CLPP 0.8305.

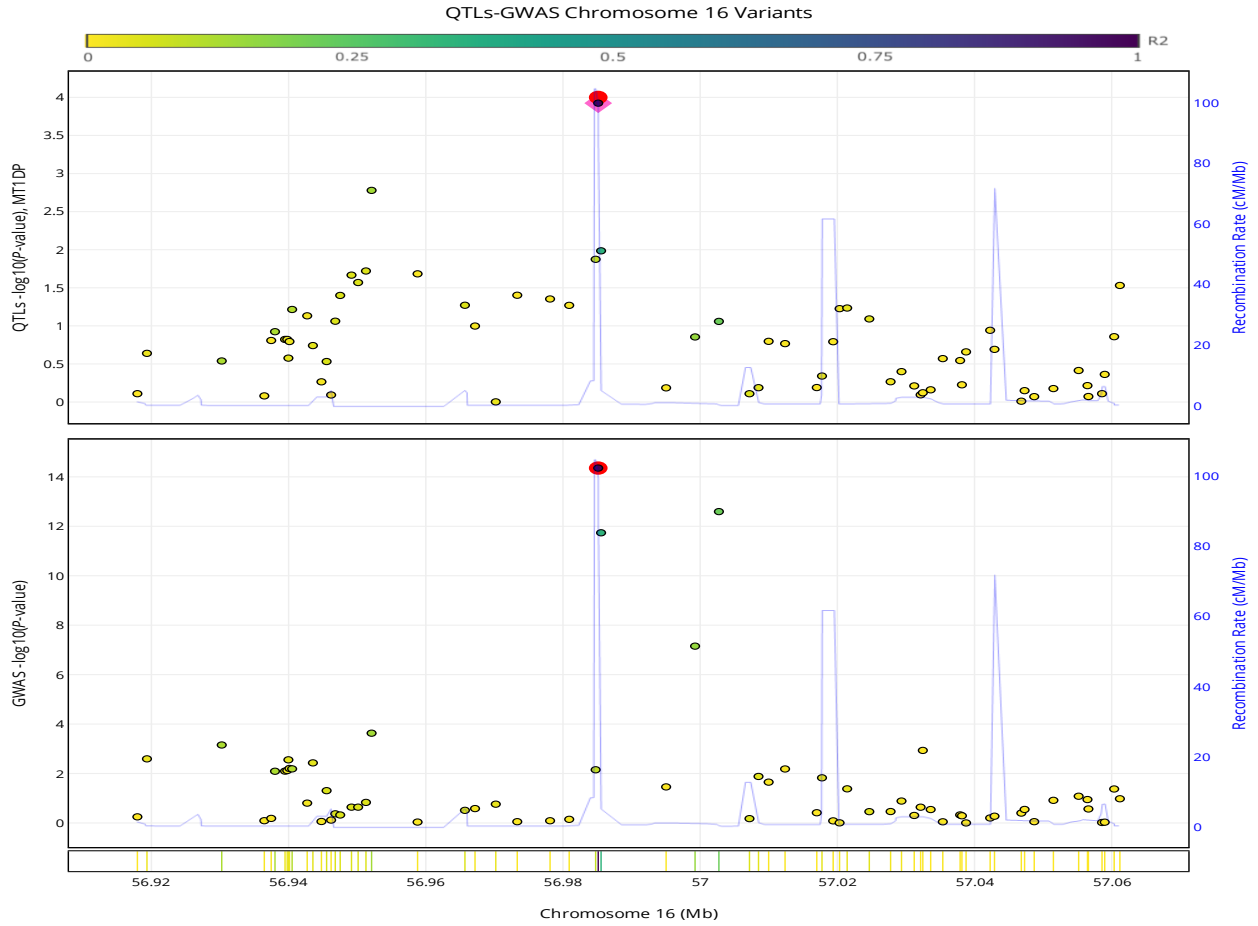

Colocalization between CETP gene and HDL-C x Ever Smoking in Stomach tissue. rs12720926 is a potential causal SNP with CLPP 0.2736.

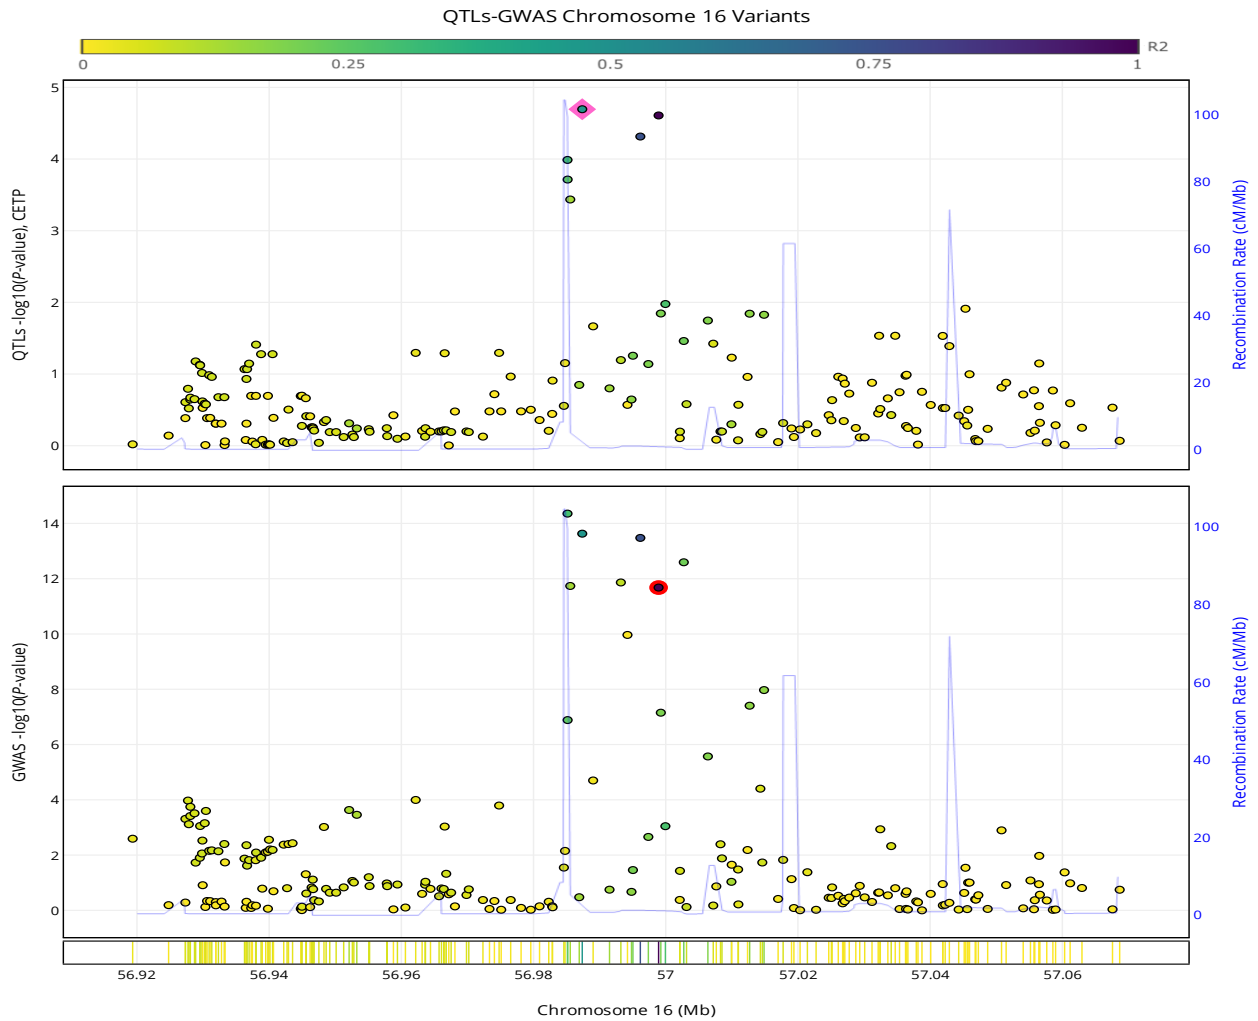

Colocalization between CETP gene and HDL-C x Ever Smoking in Stomach tissue. rs3816117 is a potential causal SNP with CLPP 0.1678.

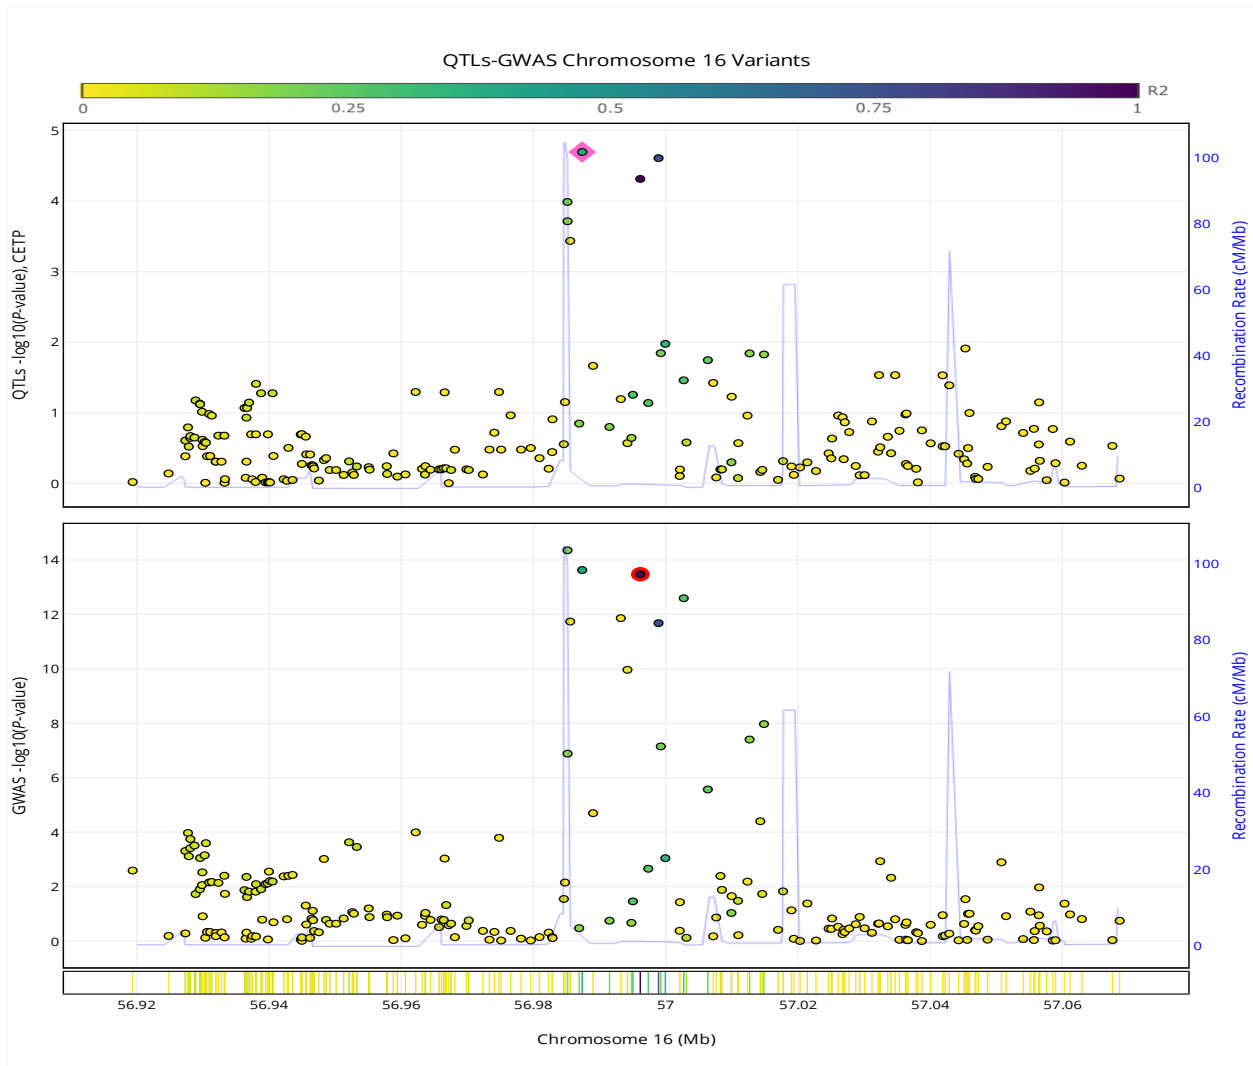

**Supplementary Figure 15.** The effect of adding a variant within the 500kb region of the SNP reported in Table 1. The significance (P-value of the interaction test) of the SNPs in table 1 have little changes, indicating no variants in the region can account for the interaction evidence.

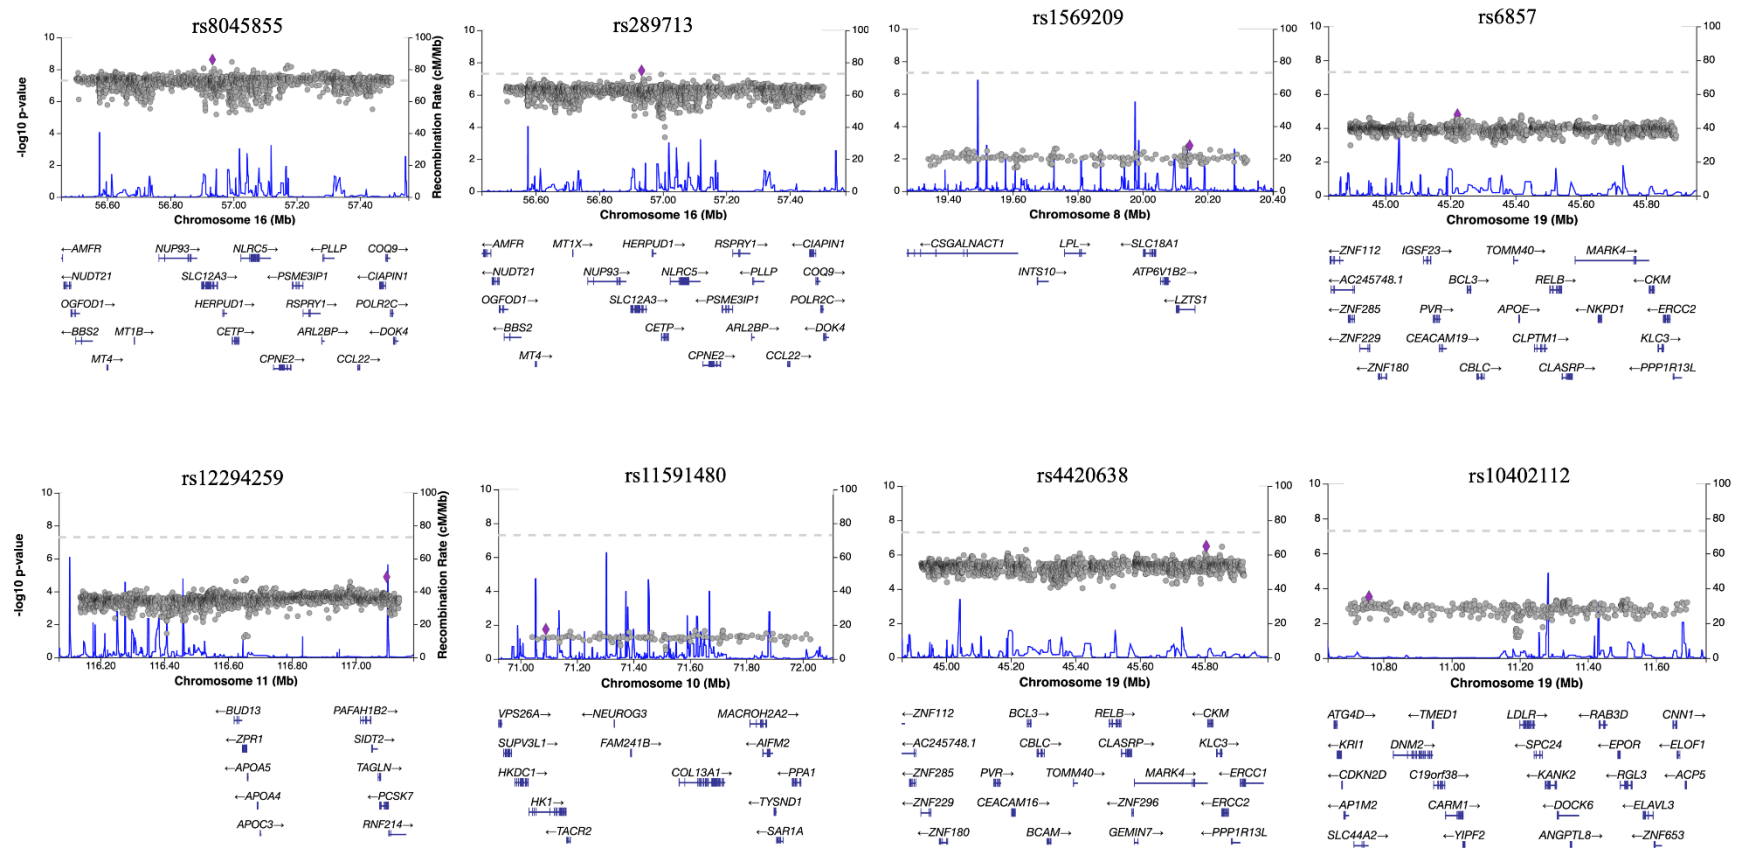

## References

1. H. Aschard, A perspective on interaction effects in genetic association studies. *Genet Epidemiol* **40**, 678-688 (2016).
